# Supplementary material for: Genome-Based Comparison of All Species of the Genus Moorella, and Status of the Species Moorella thermoacetica and Moorella thermoautotrophica
Source: Front Microbiol. 2020 Jan 17;10:3070. doi: 10.3389/fmicb.2019.03070 (PMC6978639; doi:10.3389/fmicb.2019.03070)
Supplement: Supplementary file 5 [file Table_3.XLSX]

## Sheet: M. thermoacetica DSM103132
Table S3: Genomic islands (M. thermoacetica DSM103132)
Island No.	Island start	Island end	Length (bp)	Method	Gene ID	Locus	Gene start	Gene end	Strand	Product
1	11728	16562	4834	Predicted by at least one method	lacC_1	Maut_00011	11728	12654	1	Tagatose-6-phosphate kinase
					fruA_1	Maut_00012	12706	14094	1	PTS system fructose-specific EIIBC component
					fruA_2	Maut_00013	14113	14577	1	PTS system fructose-specific EIIABC component
					ptsH	Maut_00014	14582	14863	1	Phosphocarrier protein HPr
					ptsI_1	Maut_00015	14853	16562	1	Phosphoenolpyruvate-protein phosphotransferase
2	178050	183540	5490	Predicted by at least one method		Maut_00189	178050	178487	1	hypothetical protein
						Maut_00190	178690	178932	1	hypothetical protein
					vapC_1	Maut_00191	178922	179356	1	tRNA(fMet)-specific endonuclease VapC
						Maut_00192	179640	180134	1	Nucleotidyltransferase domain protein
						Maut_00193	180073	180459	1	hypothetical protein
						Maut_00194	180615	181241	1	hypothetical protein
						Maut_00195	181357	181578	1	hypothetical protein
						Maut_00196	181595	181750	1	hypothetical protein
						Maut_00197	181866	182150	1	Helix-turn-helix domain protein
						Maut_00198	182147	182626	1	hypothetical protein
						Maut_00199	182673	183107	1	hypothetical protein
						Maut_00200	183097	183540	1	hypothetical protein
3	238572	245900	7328	Predicted by at least one method		Maut_00254	238572	238829	1	hypothetical protein
					deoR	Maut_00255	239051	240058	1	Deoxyribonucleoside regulator
					garP	Maut_00256	240158	241474	1	putative galactarate transporter
						Maut_00257	241570	242919	1	hypothetical protein
					pdxA2_1	Maut_00258	242919	243929	1	4-hydroxythreonine-4-phosphate dehydrogenase 2
					tpiA_1	Maut_00259	243991	244755	1	Triosephosphate isomerase
					ywlF_1	Maut_00260	244783	245250	1	Putative sugar phosphate isomerase YwlF
					tal_1	Maut_00261	245253	245900	1	Transaldolase
						Maut_00344	324875	326362	1	Integrase core domain protein
						Maut_00345	326359	327117	1	transposase
						Maut_00346	327221	327394	-1	hypothetical protein
						Maut_00347	327501	327647	1	hypothetical protein
					ydaM	Maut_00348	327875	328189	1	putative diguanylate cyclase YdaM
						Maut_00349	328331	328540	1	hypothetical protein
						Maut_00350	328537	328785	1	YcfA-like protein
						Maut_00351	329124	329606	1	ABC nitrate/sulfonate/bicarbonate family transporter, ATPase subunit
4	336600	347268	10668	Predicted by at least one method	nagC	Maut_00360	336600	337832	1	N-acetylglucosamine repressor
					siaP_1	Maut_00361	338229	339236	1	Sialic acid-binding periplasmic protein SiaP precursor
						Maut_00362	339267	339794	1	Tripartite ATP-independent periplasmic transporters, DctQ component
					siaT_1	Maut_00363	339820	341100	1	Sialic acid TRAP transporter permease protein SiaT
					hemE_1	Maut_00364	341132	342163	1	Uroporphyrinogen decarboxylase
					fabG_1	Maut_00365	342186	342947	1	3-oxoacyl-[acyl-carrier-protein] reductase FabG
						Maut_00366	342990	344240	1	hypothetical protein
					mtlK	Maut_00367	344502	346118	1	Mannitol 2-dehydrogenase
					uxuA	Maut_00368	346189	347268	1	Mannonate dehydratase
5	394111	400949	6838	Predicted by at least one method		Maut_00418	394111	394323	-1	hypothetical protein
						Maut_00419	395039	395665	1	hypothetical protein
					ecfA2_1	Maut_00420	395729	396562	1	Energy-coupling factor transporter ATP-binding protein EcfA2
					ecfT_1	Maut_00421	396555	397412	1	Energy-coupling factor transporter transmembrane protein EcfT
					ecfA2_2	Maut_00422	397357	398280	1	Energy-coupling factor transporter ATP-binding protein EcfA2
					atzA	Maut_00423	398296	399651	1	Atrazine chlorohydrolase
						Maut_00424	399804	400949	1	8-oxoguanine deaminase
6	431520	437602	6082	Predicted by at least one method		Maut_00450	431520	431771	1	hypothetical protein
					griI	Maut_00451	432732	433535	1	2-amino-4,5-dihydroxy-6-one-heptanoic acid-7-phosphate synthase
						Maut_00452	433542	434579	1	D-arabitol-phosphate dehydrogenase
					xylB	Maut_00453	434576	436075	1	Xylulose kinase
					gudP	Maut_00454	436277	437602	1	putative glucarate transporter
					bdhA	Maut_00491	493759	494964	1	NADH-dependent butanol dehydrogenase A
					yvgN	Maut_00492	494989	495852	1	Glyoxal reductase
						Maut_00493	495894	496424	1	flavodoxin
						Maut_00494	496443	496880	1	Cupin domain protein
					adhR	Maut_00495	497018	497410	1	HTH-type transcriptional regulator AdhR
						Maut_00496	497412	498833	-1	hypothetical protein
7	521097	686730	165633	Predicted by at least one method		Maut_00524	521097	521552	-1	hypothetical protein
					immR_1	Maut_00525	521596	522078	-1	HTH-type transcriptional regulator ImmR
						Maut_00526	522222	522452	1	helix-turn-helix protein
						Maut_00527	522475	523179	1	hypothetical protein
						Maut_00528	523332	524042	1	hypothetical protein
						Maut_00529	524046	524393	1	hypothetical protein
						Maut_00530	524422	524937	1	hypothetical protein
						Maut_00531	524968	525384	1	hypothetical protein
						Maut_00532	526032	529163	1	hypothetical protein
						Maut_00533	529709	530215	1	hypothetical protein
					pcrA_2	Maut_00534	530231	532246	1	ATP-dependent DNA helicase PcrA
						Maut_00535	532272	533837	1	3'-5' exonuclease
						Maut_00536	533941	534699	-1	transposase
						Maut_00537	534696	536183	-1	Integrase core domain protein
					polA_1	Maut_00538	536248	537885	1	DNA polymerase I, thermostable
						Maut_00539	538464	538619	1	hypothetical protein
						Maut_00540	538778	538978	1	hypothetical protein
					mcp4_1	Maut_00541	539546	541489	1	Methyl-accepting chemotaxis protein 4
					cheW_1	Maut_00542	541520	543025	1	Chemotaxis protein CheW
					cheB_1	Maut_00543	543022	543591	1	Chemotaxis response regulator protein-glutamate methylesterase
					cheB_2	Maut_00544	543594	544070	1	Chemotaxis response regulator protein-glutamate methylesterase
						Maut_00545	544028	544201	-1	hypothetical protein
					cheR2_1	Maut_00546	544705	545520	1	Chemotaxis protein methyltransferase Cher2
					cheA_1	Maut_00547	545541	546974	1	Chemotaxis protein CheA
					cheA_2	Maut_00548	546981	547868	1	Chemotaxis protein CheA
						Maut_00549	547881	548033	1	hypothetical protein
						Maut_00550	548221	548463	1	hypothetical protein
						Maut_00551	548789	549622	1	Integrase core domain protein
						Maut_00552	549818	550663	1	HD domain protein
					pomA_2	Maut_00553	551367	552194	1	Chemotaxis protein PomA
					motB_2	Maut_00554	552157	552906	1	Motility protein B
						Maut_00555	553430	553756	1	hypothetical protein
						Maut_00556	553758	554228	1	hypothetical protein
						Maut_00557	554318	555805	1	Integrase core domain protein
						Maut_00558	555802	556560	1	transposase
						Maut_00559	556808	557392	1	hypothetical protein
						Maut_00560	557409	557621	1	hypothetical protein
						Maut_00561	557803	557985	1	hypothetical protein
						Maut_00562	558216	559202	1	Calcineurin-like phosphoesterase
						Maut_00563	559260	559472	1	hypothetical protein
						Maut_00565	560007	561266	1	HNH endonuclease
						Maut_00569	562133	563629	1	hypothetical protein
						Maut_00570	563662	563931	1	hypothetical protein
						Maut_00571	563955	565397	1	chromosome segregation protein
						Maut_00572	565366	565716	1	hypothetical protein
						Maut_00573	565706	566341	1	chromosome segregation protein
						Maut_00574	566360	566680	1	hypothetical protein
						Maut_00575	566680	567093	1	Flagellar basal body-associated protein FliL
						Maut_00576	567249	567569	1	hypothetical protein
						Maut_00577	567610	567828	1	hypothetical protein
						Maut_00578	567930	568244	1	hypothetical protein
						Maut_00579	568204	568446	1	hypothetical protein
						Maut_00580	568467	568658	1	hypothetical protein
						Maut_00581	568619	569377	1	hypothetical protein
						Maut_00582	569457	571325	1	ribosomal protein S6 modification protein
						Maut_00583	571318	572760	1	Putative amidoligase enzyme
						Maut_00584	572776	573486	1	hypothetical protein
						Maut_00585	573493	574503	1	hypothetical protein
						Maut_00586	574519	574728	1	hypothetical protein
						Maut_00587	574710	574937	1	hypothetical protein
					mcpC	Maut_00588	575374	577353	1	Methyl-accepting chemotaxis protein McpC
					dpnA_1	Maut_00589	577657	579132	1	Modification methylase DpnIIB
						Maut_00590	579151	579576	1	hypothetical protein
						Maut_00591	579596	580051	1	hypothetical protein
					ydjM	Maut_00592	580057	580701	1	Inner membrane protein YdjM
						Maut_00593	581180	582202	1	hypothetical protein
						Maut_00594	582229	583137	1	hypothetical protein
						Maut_00595	583159	584688	1	AAA-like domain protein
						Maut_00596	584778	585851	1	Putative transposase DNA-binding domain protein
					rpsA	Maut_00597	586127	586945	1	30S ribosomal protein S1
						Maut_00598	586981	587247	1	hypothetical protein
						Maut_00599	587280	587816	1	hypothetical protein
						Maut_00600	588387	588698	1	hypothetical protein
						Maut_00601	589363	589554	1	hypothetical protein
						Maut_00602	590029	590616	1	hypothetical protein
						Maut_00603	591125	591619	1	hypothetical protein
						Maut_00604	591778	592683	1	PD-(D/E)XK nuclease family transposase
						Maut_00605	593081	594373	-1	putative transposase
						Maut_00606	594470	594778	1	hypothetical protein
					dpnA_2	Maut_00607	594806	595633	1	Modification methylase DpnIIB
						Maut_00608	595636	595764	1	hypothetical protein
					recU	Maut_00609	595769	596305	1	Holliday junction resolvase RecU
						Maut_00610	596298	596657	-1	Plasmid stabilization system protein
						Maut_00611	596641	596991	-1	Phd_YefM
					dnaN_2	Maut_00612	597104	598243	1	DNA polymerase III subunit beta
						Maut_00613	598269	598715	1	hypothetical protein
						Maut_00614	598712	599164	1	tRNA-specific adenosine deaminase
						Maut_00615	599143	599886	1	dephospho-CoA kinase
					nrdZ_1	Maut_00616	599904	602918	1	Ribonucleoside-diphosphate reductase NrdZ
						Maut_00617	602932	603765	-1	hypothetical protein
						Maut_00618	603828	604046	1	hypothetical protein
						Maut_00619	604199	604633	1	hypothetical protein
					hhaIM	Maut_00620	604593	606719	1	Modification methylase HhaI
					spoVS_1	Maut_00621	606719	607000	1	Stage V sporulation protein S
						Maut_00622	607035	607361	1	hypothetical protein
						Maut_00623	607392	608603	1	hypothetical protein
						Maut_00624	608755	609696	1	Conjugative transposon protein TcpC
						Maut_00625	610021	610320	1	hypothetical protein
						Maut_00626	610421	610810	1	TcpE family protein
						Maut_00627	610824	611222	1	hypothetical protein
						Maut_00628	611274	613682	1	AAA-like domain protein
						Maut_00629	613903	614418	1	hypothetical protein
						Maut_00630	614921	615148	1	hypothetical protein
						Maut_00631	615117	618215	1	hypothetical protein
					yvhJ_1	Maut_00632	618315	619283	1	Putative transcriptional regulator YvhJ
						Maut_00633	619331	620554	1	ParB-like nuclease domain protein
						Maut_00634	620658	621416	-1	transposase
						Maut_00635	621413	622900	-1	Integrase core domain protein
						Maut_00636	623090	623218	1	hypothetical protein
						Maut_00637	623184	623594	1	hypothetical protein
					mepM_2	Maut_00638	623608	624642	1	Murein DD-endopeptidase MepM
						Maut_00639	625398	626234	1	hypothetical protein
						Maut_00640	626287	626643	1	hypothetical protein
						Maut_00641	626707	627294	1	hypothetical protein
						Maut_00642	627326	630289	1	CobQ/CobB/MinD/ParA nucleotide binding domain protein
						Maut_00643	630851	631609	-1	transposase
						Maut_00644	631606	633093	-1	Integrase core domain protein
						Maut_00645	633403	633927	1	hypothetical protein
						Maut_00646	634243	634641	1	Transposase IS200 like protein
						Maut_00647	634652	635974	1	putative transposase
						Maut_00648	636183	636563	1	Protease inhibitor precursor
						Maut_00649	636664	636963	1	hypothetical protein
						Maut_00650	637265	637846	1	hypothetical protein
						Maut_00651	637946	640321	1	hypothetical protein
						Maut_00652	640388	640786	1	hypothetical protein
						Maut_00653	640741	641181	1	hypothetical protein
						Maut_00654	641204	642301	1	hypothetical protein
						Maut_00655	642301	642471	1	hypothetical protein
						Maut_00656	642709	643476	1	Lumazine-binding domain protein
						Maut_00657	643554	644354	1	Bacterial type II secretion system protein F domain protein
						Maut_00658	644423	644611	1	hypothetical protein
						Maut_00659	644684	644875	1	hypothetical protein
						Maut_00660	644948	645139	1	hypothetical protein
						Maut_00661	645212	645403	1	hypothetical protein
						Maut_00662	645476	645667	1	hypothetical protein
						Maut_00663	645738	645935	1	Flp/Fap pilin component
						Maut_00664	645949	646692	1	hypothetical protein
						Maut_00665	646720	647373	1	flagellar basal body P-ring biosynthesis protein FlgA
						Maut_00666	647377	648195	1	hypothetical protein
						Maut_00667	648256	649605	1	Putative conjugal transfer protein/MT3759
						Maut_00668	649593	650423	1	Bacterial type II secretion system protein F domain protein
						Maut_00669	650416	650943	1	hypothetical protein
						Maut_00670	650940	651440	1	Type IV leader peptidase family protein
						Maut_00671	651458	652648	1	hypothetical protein
						Maut_00672	652650	653243	1	hypothetical protein
						Maut_00673	653251	654438	1	Putative conjugal transfer protein/MT3759
						Maut_00674	654435	655223	1	Bacterial type II secretion system protein F domain protein
						Maut_00675	655217	655978	1	hypothetical protein
						Maut_00676	656163	656981	1	hypothetical protein
						Maut_00677	657136	657618	1	hypothetical protein
						Maut_00678	658160	659422	-1	putative transposase
						Maut_00679	659391	659837	-1	Transposase IS200 like protein
						Maut_00680	660081	661007	1	PKD domain protein
						Maut_00681	661017	661427	1	Transposase IS200 like protein
						Maut_00682	661384	662520	1	putative transposase
						Maut_00683	662669	663091	1	hypothetical protein
						Maut_00684	663239	666334	1	hypothetical protein
						Maut_00685	666396	666575	1	hypothetical protein
						Maut_00686	666572	667042	1	TadE-like protein
						Maut_00687	667039	667581	1	hypothetical protein
					pilT_1	Maut_00688	667642	668844	1	Twitching mobility protein
						Maut_00689	668911	669612	1	hypothetical protein
					icaB_1	Maut_00690	669639	670523	1	Poly-beta-1,6-N-acetyl-D-glucosamine N-deacetylase precursor
					divIVA_1	Maut_00691	670543	671298	1	Septum site-determining protein DivIVA
					pgaC_2	Maut_00692	671295	672563	1	Poly-beta-1,6-N-acetyl-D-glucosamine synthase
					rpfG_2	Maut_00693	672628	673722	1	Cyclic di-GMP phosphodiesterase response regulator RpfG
					gmr_1	Maut_00694	673719	674612	1	Cyclic di-GMP phosphodiesterase Gmr
						Maut_00695	674609	675136	1	hypothetical protein
						Maut_00696	675542	678430	1	Bacterial Ig-like domain (group 1)
						Maut_00697	678720	679373	-1	hypothetical protein
						Maut_00698	679499	679762	1	hypothetical protein
						Maut_00699	679889	680764	1	hypothetical protein
						Maut_00700	680791	681174	1	hypothetical protein
						Maut_00701	681248	681628	1	AIG2-like family protein
						Maut_00702	681655	682197	1	hypothetical protein
						Maut_00703	682219	682956	1	hypothetical protein
						Maut_00704	682953	683390	1	hypothetical protein
						Maut_00705	683541	684407	1	hypothetical protein
						Maut_00706	684691	685224	1	hypothetical protein
						Maut_00707	685248	685544	-1	hypothetical protein
					dinB_1	Maut_00708	685531	686730	-1	DNA polymerase IV
8	599904	604633	4729	Predicted by at least one method	nrdZ_1	Maut_00616	599904	602918	1	Ribonucleoside-diphosphate reductase NrdZ
						Maut_00617	602932	603765	-1	hypothetical protein
						Maut_00618	603828	604046	1	hypothetical protein
						Maut_00619	604199	604633	1	hypothetical protein
					hhaIM	Maut_00620	604593	606719	1	Modification methylase HhaI
9	792150	796954	4804	Predicted by at least one method	glcR	Maut_00811	792150	792914	1	HTH-type transcriptional repressor GlcR
					kbaY	Maut_00812	792944	793798	1	D-tagatose-1,6-bisphosphate aldolase subunit KbaY
						Maut_00813	793864	794946	1	bifunctional phosphoglucose/phosphomannose isomerase
					lacC_2	Maut_00814	794943	795878	1	Tagatose-6-phosphate kinase
					rbsB	Maut_00815	795974	796954	1	D-ribose-binding periplasmic protein precursor
10	822381	835137	12756	Predicted by at least one method		Maut_00849	822381	823913	1	Polysaccharide biosynthesis protein
						Maut_00850	824055	825338	1	hypothetical protein
					wbbL	Maut_00851	825351	826481	1	N-acetylglucosaminyl-diphospho-decaprenol L-rhamnosyltransferase
					mshA	Maut_00852	826567	827517	1	D-inositol-3-phosphate glycosyltransferase
					asnB_1	Maut_00853	827592	828701	1	Asparagine synthetase [glutamine-hydrolyzing] 1
					asnB_2	Maut_00854	828671	829546	1	Asparagine synthetase [glutamine-hydrolyzing] 1
					wbiB	Maut_00855	829726	830658	1	dTDP-L-rhamnose 4-epimerase
					wbpA	Maut_00856	830655	831941	1	UDP-N-acetyl-D-glucosamine 6-dehydrogenase
					pglA_1	Maut_00857	831968	833083	1	N, N'-diacetylbacillosaminyl-diphospho-undecaprenol alpha-1,3-N-acetylgalactosaminyltransferase
						Maut_00858	833371	833538	1	hypothetical protein
						Maut_00859	833693	834580	1	hypothetical protein
						Maut_00860	834792	834896	1	UDP-galactose-4-epimerase
						Maut_00861	834943	835137	1	Transposase
11	836275	841487	5212	Predicted by at least one method		Maut_00863	836275	837090	1	UDP-glucose 4-epimerase
						Maut_00864	837111	838412	1	deoxyguanosinetriphosphate triphosphohydrolase-like protein
						Maut_00865	838414	838974	1	hypothetical protein
					epsL	Maut_00866	839073	839699	1	putative sugar transferase EpsL
					carB_1	Maut_00867	839747	840745	1	Carbamoyl-phosphate synthase large chain
					gph	Maut_00868	840759	841487	1	Phosphoglycolate phosphatase
12	918392	926835	8443	Predicted by at least one method	pseB	Maut_00944	917350	918444	1	UDP-N-acetylglucosamine 4,6-dehydratase (inverting)
						Maut_00945	918392	919357	1	UDP-glucose 4-epimerase
					arnB_2	Maut_00946	919405	920640	1	UDP-4-amino-4-deoxy-L-arabinose--oxoglutarate aminotransferase
						Maut_00947	921057	922559	1	bifunctional 3-demethylubiquinone-9 3-methyltransferase/ 2-octaprenyl-6-hydroxy phenol methylase
					kanE	Maut_00948	922870	924480	1	Alpha-D-kanosaminyltransferase
						Maut_00949	924494	925654	1	putative glycosyl transferase
					epsD	Maut_00950	925678	926835	1	Putative glycosyltransferase EpsD
13	928239	938325	10086	Predicted by at least one method		Maut_00953	928239	928367	1	Transposase DDE domain protein
					neuB	Maut_00954	928562	929590	1	N,N'-diacetyllegionaminic acid synthase
						Maut_00955	929609	930595	1	carbamoyl phosphate synthase-like protein
					kpsU	Maut_00956	930618	931358	1	3-deoxy-manno-octulosonate cytidylyltransferase
						Maut_00957	931380	932423	1	undecaprenyldiphospho-muramoylpentapeptide beta-N- acetylglucosaminyltransferase
						Maut_00958	932453	933649	1	hypothetical protein
					hag	Maut_00959	933844	934800	1	Flagellin
						Maut_00960	934863	936638	1	hypothetical protein
						Maut_00961	936619	937179	1	hypothetical protein
						Maut_00962	937654	938325	1	hypothetical protein
14	1140912	1150326	9414	Predicted by at least one method		Maut_01184	1140912	1141958	1	putative peptidase
						Maut_01185	1142108	1143193	1	methylcobalamin:coenzyme M methyltransferase
						Maut_01186	1143222	1144271	1	methylcobalamin:coenzyme M methyltransferase
						Maut_01187	1144338	1145465	1	methylcobalamin:coenzyme M methyltransferase
						Maut_01188	1145495	1146484	1	hypothetical protein
					araF	Maut_01189	1146621	1147679	1	L-arabinose-binding periplasmic protein precursor
					mglA_1	Maut_01190	1147797	1149308	1	Galactose/methyl galactoside import ATP-binding protein MglA
					rbsC_3	Maut_01191	1149343	1150326	1	Ribose transport system permease protein RbsC
15	1196875	1201985	5110	Predicted by at least one method		Maut_01242	1196875	1197486	1	hypothetical protein
					yndE_1	Maut_01243	1197779	1198858	-1	Spore germination protein YndE
					gerBC_1	Maut_01244	1198862	1200049	-1	Spore germination protein B3 precursor
					gerBA_1	Maut_01245	1200046	1201647	-1	Spore germination protein B1
						Maut_01246	1201731	1201985	-1	hypothetical protein
16	1320674	1325070	4396	Predicted by at least one method		Maut_01374	1320674	1320877	1	hypothetical protein
						Maut_01375	1320931	1324563	-1	hypothetical protein
						Maut_01376	1324614	1324913	-1	hypothetical protein
						Maut_01377	1324852	1325070	-1	hypothetical protein
						Maut_01378	1325067	1325495	-1	hypothetical protein
17	1346636	1352502	5866	Predicted by at least one method		Maut_01402	1346636	1347214	1	hypothetical protein
						Maut_01403	1347211	1347969	1	transposase
						Maut_01404	1348181	1348420	-1	hypothetical protein
						Maut_01405	1348721	1348987	-1	hypothetical protein
						Maut_01406	1349064	1349252	-1	hypothetical protein
						Maut_01407	1349330	1351966	-1	hypothetical protein
						Maut_01408	1352049	1352312	-1	Helix-turn-helix domain protein
						Maut_01409	1352287	1352502	-1	Helix-turn-helix domain protein
17	1780556	1786994	6438	Predicted by at least one method	tnpR	Maut_01858	1778938	1780578	-1	Transposon gamma-delta resolvase
						Maut_01859	1780556	1780759	-1	hypothetical protein
						Maut_01860	1780980	1781213	-1	hypothetical protein
						Maut_01861	1781288	1781674	-1	HEPN domain protein
						Maut_01862	1781671	1782006	-1	Nucleotidyltransferase domain protein
						Maut_01863	1782367	1782651	-1	HEPN domain protein
						Maut_01864	1782777	1782962	-1	hypothetical protein
						Maut_01865	1782955	1783353	-1	HEPN domain protein
						Maut_01866	1783343	1783657	-1	Nucleotidyltransferase domain protein
						Maut_01867	1784151	1784516	-1	hypothetical protein
						Maut_01868	1784573	1784887	-1	hypothetical protein
						Maut_01869	1784884	1785189	-1	Transposase
					dcuS_1	Maut_01870	1785675	1786508	-1	Sensor histidine kinase DcuS
						Maut_01871	1786518	1786994	-1	hypothetical protein
19	1964953	1975649	10696	Predicted by at least one method		Maut_02048	1964953	1965828	-1	IS2 transposase TnpB
						Maut_02049	1965825	1966130	-1	Transposase
					cheA_4	Maut_02050	1966226	1967113	-1	Chemotaxis protein CheA
					cheA_5	Maut_02051	1967120	1968553	-1	Chemotaxis protein CheA
						Maut_02052	1968555	1968947	-1	hypothetical protein
					cheR2_2	Maut_02053	1968984	1969787	-1	Chemotaxis protein methyltransferase Cher2
						Maut_02054	1969809	1970402	-1	hypothetical protein
					cheB_3	Maut_02055	1970405	1971457	-1	Chemotaxis response regulator protein-glutamate methylesterase
					cheW_3	Maut_02056	1971454	1972959	-1	Chemotaxis protein CheW
					mcp4_2	Maut_02057	1972990	1974933	-1	Methyl-accepting chemotaxis protein 4
						Maut_02058	1975437	1975649	-1	hypothetical protein
20	2037352	2042139	4787	Predicted by at least one method		Maut_02120	2037352	2037738	-1	hypothetical protein
						Maut_02121	2037735	2038055	-1	hypothetical protein
						Maut_02122	2038125	2040170	-1	hypothetical protein
						Maut_02123	2040228	2040728	-1	hypothetical protein
						Maut_02124	2040756	2041136	-1	hypothetical protein
						Maut_02125	2041162	2041413	-1	hypothetical protein
						Maut_02126	2041454	2041696	-1	hypothetical protein
						Maut_02127	2041696	2042139	-1	hypothetical protein
						Maut_02128	2042111	2043115	-1	hypothetical protein
21	2046228	2056214	9986	Predicted by at least one method		Maut_02131	2045195	2046238	-1	recombinase A
						Maut_02132	2046228	2046497	-1	hypothetical protein
					thyX_1	Maut_02133	2046485	2047123	-1	Thymidylate synthase ThyX
						Maut_02134	2047125	2047247	-1	hypothetical protein
					rlmN_2	Maut_02135	2047263	2048087	-1	putative dual-specificity RNA methyltransferase RlmN
					yocH_3	Maut_02136	2048107	2048547	-1	Cell wall-binding protein YocH precursor
						Maut_02137	2048570	2048929	-1	hypothetical protein
						Maut_02138	2048926	2049270	-1	hypothetical protein
						Maut_02139	2049473	2049697	-1	hypothetical protein
						Maut_02140	2049723	2050208	-1	hypothetical protein
						Maut_02141	2050210	2050692	-1	hypothetical protein
						Maut_02142	2050689	2051066	-1	hypothetical protein
						Maut_02143	2051087	2051287	-1	hypothetical protein
						Maut_02144	2051307	2051801	-1	hypothetical protein
					lexA_3	Maut_02145	2051813	2052244	-1	LexA repressor
						Maut_02146	2052339	2052656	-1	hypothetical protein
						Maut_02147	2052646	2053203	-1	Uracil DNA glycosylase superfamily protein
						Maut_02148	2053196	2053894	-1	Rad52/22 family double-strand break repair protein
						Maut_02149	2053881	2054057	-1	hypothetical protein
					spoVT_2	Maut_02150	2054090	2054584	-1	Stage V sporulation protein T
						Maut_02151	2054733	2056214	-1	hypothetical protein
					ravA	Maut_02152	2056190	2057311	-1	ATPase RavA
22	2061749	2068785	7036	Predicted by at least one method		Maut_02158	2061749	2061958	-1	hypothetical protein
						Maut_02159	2061973	2062599	-1	hypothetical protein
						Maut_02160	2062592	2063470	-1	hypothetical protein
						Maut_02161	2063486	2063953	-1	hypothetical protein
						Maut_02162	2064058	2064273	-1	hypothetical protein
						Maut_02163	2064355	2064582	-1	hypothetical protein
						Maut_02164	2064584	2064841	-1	hypothetical protein
						Maut_02165	2064876	2065706	-1	hypothetical protein
						Maut_02166	2065759	2066163	-1	hypothetical protein
						Maut_02167	2066184	2066342	-1	hypothetical protein
						Maut_02168	2066358	2066588	-1	hypothetical protein
						Maut_02169	2066581	2066781	-1	hypothetical protein
						Maut_02170	2066768	2067022	-1	hypothetical protein
						Maut_02171	2067023	2067412	-1	hypothetical protein
						Maut_02172	2067429	2068091	-1	hypothetical protein
						Maut_02173	2068114	2068785	-1	hypothetical protein
23	2070915	2080913	9998	Predicted by at least one method	sbcC	Maut_02174	2068802	2070934	-1	Nuclease SbcCD subunit C
						Maut_02175	2070915	2071361	-1	hypothetical protein
						Maut_02176	2071409	2071879	-1	hypothetical protein
						Maut_02177	2071879	2072067	-1	hypothetical protein
					yhaO_3	Maut_02178	2072030	2073133	-1	putative metallophosphoesterase YhaO
						Maut_02179	2073381	2073938	-1	hypothetical protein
						Maut_02180	2073935	2074204	-1	hypothetical protein
					nrnB	Maut_02181	2074207	2075046	-1	Oligoribonuclease NrnB
					clpX_2	Maut_02182	2075082	2075258	-1	ATP-dependent Clp protease ATP-binding subunit ClpX
						Maut_02183	2075301	2075456	-1	hypothetical protein
						Maut_02184	2075494	2075721	-1	hypothetical protein
						Maut_02185	2075725	2076399	-1	hypothetical protein
						Maut_02186	2076374	2076787	-1	RNA ligase
						Maut_02187	2077283	2077717	-1	hypothetical protein
						Maut_02188	2077754	2078566	-1	hypothetical protein
						Maut_02189	2078545	2079087	-1	hypothetical protein
						Maut_02190	2079158	2079355	-1	hypothetical protein
						Maut_02191	2079379	2080362	-1	Leucine rich repeat variant
						Maut_02192	2080341	2080913	-1	hypothetical protein
24	2081776	2087091	5315	Predicted by at least one method		Maut_02194	2081776	2082720	-1	Leucine rich repeat variant
					dut	Maut_02195	2082744	2083166	-1	Deoxyuridine 5'-triphosphate nucleotidohydrolase
						Maut_02196	2083250	2083408	-1	hypothetical protein
						Maut_02197	2083408	2083656	-1	RyR domain protein
						Maut_02198	2083746	2084024	-1	hypothetical protein
						Maut_02199	2084053	2084214	-1	hypothetical protein
						Maut_02200	2084242	2084736	-1	YopX protein
						Maut_02201	2084684	2084917	-1	hypothetical protein
						Maut_02202	2084918	2086258	-1	hypothetical protein
						Maut_02203	2086345	2087091	-1	hypothetical protein
						Maut_02204	2087082	2087273	-1	hypothetical protein
25	2087468	2108523	21055	Predicted by at least one method		Maut_02205	2087468	2088271	-1	hypothetical protein
					rapA_2	Maut_02206	2088275	2090038	-1	RNA polymerase-associated protein RapA
						Maut_02207	2090116	2091177	-1	hypothetical protein
						Maut_02208	2091177	2092349	-1	hypothetical protein
						Maut_02209	2092334	2093407	-1	hypothetical protein
						Maut_02210	2093541	2093996	-1	hypothetical protein
						Maut_02211	2094009	2094839	-1	hypothetical protein
						Maut_02212	2094862	2095083	-1	hypothetical protein
						Maut_02213	2095357	2095755	-1	hypothetical protein
						Maut_02214	2095774	2096331	-1	hypothetical protein
						Maut_02215	2096363	2096758	-1	hypothetical protein
						Maut_02216	2096777	2096893	-1	hypothetical protein
						Maut_02217	2096883	2097206	-1	hypothetical protein
						Maut_02218	2097228	2097851	-1	hypothetical protein
						Maut_02219	2097882	2098400	-1	hypothetical protein
						Maut_02220	2098403	2098855	-1	hypothetical protein
						Maut_02221	2098855	2099271	-1	hypothetical protein
						Maut_02222	2099299	2099949	-1	hypothetical protein
						Maut_02223	2100019	2100141	-1	hypothetical protein
						Maut_02224	2100266	2100550	-1	hypothetical protein
						Maut_02225	2100565	2100888	-1	hypothetical protein
						Maut_02226	2100878	2101129	-1	hypothetical protein
						Maut_02227	2101341	2101505	-1	hypothetical protein
						Maut_02228	2101516	2102031	-1	DNA recombination-mediator protein A
						Maut_02229	2102058	2102342	-1	hypothetical protein
						Maut_02230	2102281	2102952	-1	hypothetical protein
						Maut_02231	2102952	2103287	-1	hypothetical protein
						Maut_02232	2103555	2104139	-1	hypothetical protein
						Maut_02233	2104117	2104269	-1	hypothetical protein
						Maut_02234	2104266	2104385	-1	hypothetical protein
						Maut_02235	2104440	2104868	-1	hypothetical protein
						Maut_02236	2104849	2105220	-1	hypothetical protein
						Maut_02237	2105222	2105674	-1	hypothetical protein
						Maut_02238	2105705	2105893	-1	hypothetical protein
						Maut_02239	2106681	2107013	-1	hypothetical protein
					doc	Maut_02240	2107376	2107750	-1	Toxin Doc
						Maut_02241	2107747	2107911	-1	hypothetical protein
						Maut_02242	2108305	2108523	-1	hypothetical protein
26	2102952	2142740	39788	Predicted by at least one method		Maut_02231	2102952	2103287	-1	hypothetical protein
						Maut_02232	2103555	2104139	-1	hypothetical protein
						Maut_02233	2104117	2104269	-1	hypothetical protein
						Maut_02234	2104266	2104385	-1	hypothetical protein
						Maut_02235	2104440	2104868	-1	hypothetical protein
						Maut_02236	2104849	2105220	-1	hypothetical protein
						Maut_02237	2105222	2105674	-1	hypothetical protein
						Maut_02238	2105705	2105893	-1	hypothetical protein
						Maut_02239	2106681	2107013	-1	hypothetical protein
					doc	Maut_02240	2107376	2107750	-1	Toxin Doc
						Maut_02241	2107747	2107911	-1	hypothetical protein
						Maut_02242	2108305	2108523	-1	hypothetical protein
					rnhA_2	Maut_02243	2108523	2108963	-1	Ribonuclease H
						Maut_02244	2108977	2109159	-1	hypothetical protein
						Maut_02245	2109175	2109531	-1	hypothetical protein
						Maut_02246	2109769	2109948	-1	hypothetical protein
						Maut_02247	2110000	2111214	-1	hypothetical protein
						Maut_02248	2111427	2111540	-1	hypothetical protein
						Maut_02249	2111618	2112397	-1	hypothetical protein
						Maut_02250	2112482	2112652	-1	hypothetical protein
						Maut_02251	2112649	2112798	-1	hypothetical protein
						Maut_02252	2112804	2112911	-1	hypothetical protein
						Maut_02253	2113270	2114031	1	hypothetical protein
					cbpA_1	Maut_02254	2114028	2114558	1	Curved DNA-binding protein
						Maut_02255	2114569	2114727	-1	hypothetical protein
						Maut_02256	2115279	2115941	1	hypothetical protein
						Maut_02257	2115938	2116282	1	hypothetical protein
					ybeZ_2	Maut_02258	2116332	2117156	1	PhoH-like protein
						Maut_02259	2117192	2117401	1	hypothetical protein
						Maut_02260	2117385	2117870	1	hypothetical protein
						Maut_02261	2117874	2118293	1	hypothetical protein
						Maut_02262	2118300	2118623	1	hypothetical protein
						Maut_02263	2118642	2120285	1	Terminase-like family protein
						Maut_02264	2120348	2121316	1	hypothetical protein
						Maut_02265	2121318	2122178	1	hypothetical protein
						Maut_02266	2122191	2122616	1	Nucleoside 2-deoxyribosyltransferase
						Maut_02267	2122665	2124653	1	hypothetical protein
						Maut_02268	2124654	2126054	1	hypothetical protein
						Maut_02269	2126069	2127448	1	hypothetical protein
						Maut_02270	2127521	2128597	1	Phage capsid family protein
						Maut_02271	2128612	2130198	1	hypothetical protein
						Maut_02272	2130211	2131695	1	hypothetical protein
						Maut_02273	2131713	2133227	1	hypothetical protein
						Maut_02274	2133227	2133745	1	hypothetical protein
						Maut_02275	2133752	2134036	1	hypothetical protein
						Maut_02276	2134040	2134840	1	hypothetical protein
						Maut_02277	2134856	2135539	1	hypothetical protein
						Maut_02278	2135552	2135989	1	hypothetical protein
						Maut_02279	2135999	2137072	1	Phage tail sheath protein
						Maut_02280	2137252	2137623	1	hypothetical protein
						Maut_02281	2137642	2139951	1	Phage tail sheath protein
						Maut_02282	2140009	2140641	1	hypothetical protein
					speH_2	Maut_02283	2140689	2141045	1	S-adenosylmethionine decarboxylase proenzyme precursor
						Maut_02284	2141063	2141587	1	hypothetical protein
						Maut_02285	2141589	2142407	1	hypothetical protein
						Maut_02286	2142444	2142740	1	hypothetical protein
27	2112482	2118293	5811	Predicted by at least one method		Maut_02250	2112482	2112652	-1	hypothetical protein
						Maut_02251	2112649	2112798	-1	hypothetical protein
						Maut_02252	2112804	2112911	-1	hypothetical protein
						Maut_02253	2113270	2114031	1	hypothetical protein
					cbpA_1	Maut_02254	2114028	2114558	1	Curved DNA-binding protein
						Maut_02255	2114569	2114727	-1	hypothetical protein
						Maut_02256	2115279	2115941	1	hypothetical protein
						Maut_02257	2115938	2116282	1	hypothetical protein
					ybeZ_2	Maut_02258	2116332	2117156	1	PhoH-like protein
						Maut_02259	2117192	2117401	1	hypothetical protein
						Maut_02260	2117385	2117870	1	hypothetical protein
						Maut_02261	2117874	2118293	1	hypothetical protein
28	2118642	2153082	34440	Predicted by at least one method		Maut_02263	2118642	2120285	1	Terminase-like family protein
						Maut_02264	2120348	2121316	1	hypothetical protein
						Maut_02265	2121318	2122178	1	hypothetical protein
						Maut_02266	2122191	2122616	1	Nucleoside 2-deoxyribosyltransferase
						Maut_02267	2122665	2124653	1	hypothetical protein
						Maut_02268	2124654	2126054	1	hypothetical protein
						Maut_02269	2126069	2127448	1	hypothetical protein
						Maut_02270	2127521	2128597	1	Phage capsid family protein
						Maut_02271	2128612	2130198	1	hypothetical protein
						Maut_02272	2130211	2131695	1	hypothetical protein
						Maut_02273	2131713	2133227	1	hypothetical protein
						Maut_02274	2133227	2133745	1	hypothetical protein
						Maut_02275	2133752	2134036	1	hypothetical protein
						Maut_02276	2134040	2134840	1	hypothetical protein
						Maut_02277	2134856	2135539	1	hypothetical protein
						Maut_02278	2135552	2135989	1	hypothetical protein
						Maut_02279	2135999	2137072	1	Phage tail sheath protein
						Maut_02280	2137252	2137623	1	hypothetical protein
						Maut_02281	2137642	2139951	1	Phage tail sheath protein
						Maut_02282	2140009	2140641	1	hypothetical protein
					speH_2	Maut_02283	2140689	2141045	1	S-adenosylmethionine decarboxylase proenzyme precursor
						Maut_02284	2141063	2141587	1	hypothetical protein
						Maut_02285	2141589	2142407	1	hypothetical protein
						Maut_02286	2142444	2142740	1	hypothetical protein
						Maut_02287	2142745	2143263	1	hypothetical protein
						Maut_02288	2143289	2149138	1	hypothetical protein
						Maut_02289	2149153	2153082	1	hypothetical protein
29	2155568	2165223	9655	Predicted by at least one method		Maut_02292	2155568	2156509	1	hypothetical protein
						Maut_02293	2156521	2163198	1	hypothetical protein
						Maut_02294	2163207	2163578	1	hypothetical protein
						Maut_02295	2163581	2163865	1	hypothetical protein
						Maut_02296	2163822	2164100	1	hypothetical protein
						Maut_02297	2164102	2164464	1	hypothetical protein
					cwlC_2	Maut_02298	2164480	2165223	1	Sporulation-specific N-acetylmuramoyl-L-alanine amidase
30	2178036	2197132	19096	Predicted by at least one method		Maut_02310	2176490	2178049	1	hypothetical protein
						Maut_02311	2178036	2182127	1	von Willebrand factor type A domain protein
						Maut_02312	2182130	2188735	1	hypothetical protein
						Maut_02313	2188748	2189659	1	hypothetical protein
						Maut_02314	2189672	2191732	1	hypothetical protein
						Maut_02315	2191742	2193478	1	hypothetical protein
						Maut_02316	2193468	2195729	1	F5/8 type C domain protein
						Maut_02317	2195742	2196167	1	hypothetical protein
						Maut_02318	2196179	2197132	1	hypothetical protein
31	2201227	2206349	5122	Predicted by at least one method		Maut_02324	2201227	2201571	1	hypothetical protein
						Maut_02325	2201640	2202047	1	hypothetical protein
						Maut_02326	2202258	2202497	1	hypothetical protein
						Maut_02327	2202500	2202829	1	hypothetical protein
						Maut_02328	2202792	2203613	1	hypothetical protein
					isp	Maut_02329	2203610	2204512	1	Intracellular serine protease
						Maut_02330	2204518	2204667	1	hypothetical protein
						Maut_02331	2204740	2205159	1	hypothetical protein
					ruvC_2	Maut_02332	2205134	2205610	1	Crossover junction endodeoxyribonuclease RuvC
						Maut_02333	2205591	2206349	1	Sigma-70, region 4
						Maut_02334	2206303	2207091	1	PD-(D/E)XK nuclease superfamily protein
32	2242926	2251555	8629	Predicted by at least one method		Maut_02375	2242926	2243129	1	hypothetical protein
					tyrR	Maut_02376	2243867	2245465	-1	Transcriptional regulatory protein TyrR
					yhdG_3	Maut_02377	2245728	2247146	-1	putative amino acid permease YhdG
						Maut_02378	2247245	2247844	-1	indolepyruvate oxidoreductase subunit beta
						Maut_02379	2247844	2249625	-1	indolepyruvate ferredoxin oxidoreductase
					pta	Maut_02380	2249661	2250569	-1	Phosphate acetyltransferase
					buk2_1	Maut_02381	2250662	2251555	-1	Butyrate kinase 2
33	2557712	2569107	11395	Predicted by at least one method	arcC1_2	Maut_02667	2557712	2558650	-1	Carbamate kinase 1
					uacT_1	Maut_02668	2558917	2560215	-1	Uric acid transporter UacT
					trzD	Maut_02669	2560847	2561950	-1	Cyanuric acid amidohydrolase
						Maut_02670	2561996	2563408	-1	membrane protein FdrA
					sucD_2	Maut_02671	2563411	2564973	-1	Succinyl-CoA ligase [ADP-forming] subunit alpha
						Maut_02672	2564951	2565859	-1	hypothetical protein
						Maut_02673	2565880	2567115	-1	hypothetical protein
					pucR_3	Maut_02674	2567446	2569107	-1	Purine catabolism regulatory protein
34	2580920	2586970	6050	Predicted by at least one method	araD	Maut_02689	2580920	2581849	-1	L-2-keto-3-deoxyarabonate dehydratase
					xylG_2	Maut_02690	2581898	2583496	-1	Xylose import ATP-binding protein XylG
						Maut_02691	2583647	2584699	-1	Purine-binding protein precursor
						Maut_02692	2584974	2585846	-1	Branched-chain amino acid transport system / permease component
						Maut_02693	2585846	2586970	-1	Branched-chain amino acid transport system / permease component
35	2671401	2676298	4897	Predicted by at least one method		Maut_02783	2671401	2671790	1	hypothetical protein
						Maut_02784	2671855	2672532	-1	hypothetical protein
						Maut_02785	2672489	2676298	-1	hypothetical protein
36	2671855	2685871	14016	Predicted by at least one method		Maut_02784	2671855	2672532	-1	hypothetical protein
						Maut_02785	2672489	2676298	-1	hypothetical protein
						Maut_02786	2676571	2677329	-1	transposase
						Maut_02787	2677326	2678813	-1	Integrase core domain protein
						Maut_02788	2678903	2681359	-1	NACHT domain protein
						Maut_02789	2681466	2683514	-1	hypothetical protein
						Maut_02790	2683517	2685871	-1	hypothetical protein

## Sheet: M. thermoacetica DSM103284
Table S3: Genomic islands (M. thermoacetica DSM103132)
Island No.	Island start	Island end	Length (bp)	Method	Gene ID	Locus	Gene start	Gene end	Strand	Product
1	155582	171669	16087	Predicted by at least one method	ytpB	MTJW_01630	154521	155585	1	tetraprenyl-beta-curcumene synthase
					hepT_1	MTJW_01640	155582	156544	-1	heptaprenyl diphosphate synthase component 2
					ctsR	MTJW_01650	156871	157341	1	transcriptional regulator CtsR
						MTJW_01660	157356	157865	1	UvrB/uvrC motif protein
						MTJW_01670	157862	158914	1	putative ATP:guanido phosphotransferase
					clpC	MTJW_01680	158956	161478	1	negative regulator of genetic competence ClpC/MecB
					rfbB	MTJW_01690	161751	161984	1	dTDP-glucose 4,6-dehydratase
						MTJW_01700	162001	162264	1	hypothetical protein
						MTJW_01710	162286	162456	1	dTDP-4-dehydrorhamnose 3,5-epimerase
					rmlA2	MTJW_01720	162473	163540	1	glucose-1-phosphate thymidylyltransferase 2
						MTJW_01730	163943	164428	1	hypothetical protein
						MTJW_01740	164397	164612	1	YcfA-like protein
						MTJW_01750	164928	165905	1	putative transposase, YhgA-like
						MTJW_01760	166066	166302	-1	hypothetisches protein
						MTJW_01770	167467	167679	1	hypothetical protein
						MTJW_01780	167761	168021	1	UDP-glucose 4-epimerase
						MTJW_01790	168152	168958	1	putative transposase, YhgA-like
						MTJW_01800	169330	169572	1	hypothetical protein
					vapC_1	MTJW_01810	169562	169996	1	tRNA(fMet)-specific endonuclease VapC
						MTJW_01820	170010	170279	1	helix-turn-helix domain protein
						MTJW_01830	170276	170755	1	hypothetical protein
						MTJW_01840	170802	171236	1	hypothetical protein
						MTJW_01850	171226	171669	1	hypothetical protein
2	225368	235438	10070	Predicted by at least one method	tkt	MTJW_02390	225368	226183	1	transketolase
					dxs_1	MTJW_02400	226428	227363	1	1-deoxy-D-xylulose-5-phosphate synthase
						MTJW_02410	227528	228550	-1	putative transposase
					ftsE	MTJW_02420	228862	229554	1	cell division ATP-binding protein FtsE
					ftsX	MTJW_02430	229544	230431	1	cell division protein FtsX
					mepM_1	MTJW_02440	230458	231591	1	murein DD-endopeptidase MepM
					ctpB	MTJW_02450	231658	232821	1	carboxy-terminal processing protease CtpB precursor
						MTJW_02460	232988	233203	1	hypothetical protein
						MTJW_02470	233200	233430	1	YcfA-like protein
					uvrB	MTJW_02480	233447	235438	1	UvrABC system protein B
3	442127	459163	17036	Predicted by at least one method	xerC_1	MTJW_04440	442127	443071	1	tyrosine recombinase XerC
						MTJW_04450	443687	444241	1	hypothetical protein
						MTJW_04460	444506	445957	-1	hypothetical protein
						MTJW_04470	446381	449491	1	hypothetical protein
						MTJW_04480	449491	450060	1	hypothetical protein
						MTJW_04490	450077	452986	1	hypothetical protein
					rapA_1	MTJW_04500	453001	455718	1	RNA polymerase-associated protein RapA
						MTJW_04510	456087	456398	1	transposase
						MTJW_04520	456799	457125	1	hypothetical protein
						MTJW_04530	457119	457481	1	IS66 Orf2 like protein
						MTJW_04540	457562	459163	1	transposase IS66 family protein
4	581399	605937	24538	Predicted by at least one method		MTJW_05800	581399	581896	1	hypothetical protein
						MTJW_05810	583190	583714	1	hypothetical protein
						MTJW_05820	583721	584620	1	hypothetical protein
						MTJW_05830	584726	585082	1	transposase IS116/IS110/IS902 family protein
						MTJW_05840	585178	585318	1	hypothetical protein
					rapA_2	MTJW_05850	586799	590230	1	RNA polymerase-associated protein RapA
						MTJW_05860	590227	591684	1	hypothetical protein
						MTJW_05870	591681	594689	1	hypothetical protein
						MTJW_05880	594709	597678	1	hypothetical protein
						MTJW_05890	597734	597955	-1	integrase core domain protein
						MTJW_05900	598072	598677	-1	hypothetical protein
						MTJW_05910	598924	599196	1	SpoVT / AbrB like domain protein
						MTJW_05920	599522	601375	1	hypothetical protein
						MTJW_05930	601664	603052	1	hypothetical protein
						MTJW_05940	603083	603247	1	hypothetical protein
						MTJW_05950	603388	605196	-1	trehalase
						MTJW_05960	605518	605937	-1	PIN domain protein
						MTJW_05970	605934	606338	-1	hypothetisches protein
5	956984	974280	17296	Predicted by at least one method	ydbD	MTJW_09660	956984	957670	-1	putative manganese catalase
						MTJW_09670	957789	957998	-1	hypothetical protein
						MTJW_09680	958277	958486	1	hypothetical protein
						MTJW_09690	958470	958733	1	hypothetical protein
						MTJW_09700	959487	959633	1	hypothetical protein
						MTJW_09710	959835	960425	1	hypothetical protein
					prsA	MTJW_09720	960427	961209	1	foldase protein PrsA
					mazE	MTJW_09730	961549	961782	1	antitoxin MazE
					mazF	MTJW_09740	961776	962123	1	mRNA interferase MazF
						MTJW_09750	962473	962580	1	hypothetical protein
						MTJW_09760	963324	963779	1	ComEC family competence protein
						MTJW_09770	963789	964232	-1	transposase
						MTJW_09780	964384	964689	1	transposase
						MTJW_09790	964686	965561	1	integrase core domain protein
						MTJW_09800	965881	966465	1	glycerol-3-phosphate responsive antiterminator
						MTJW_09810	967106	967948	1	TIM-barrel signal transduction protein
					mtnW	MTJW_09820	968075	969391	1	2,3-diketo-5-methylthiopentyl-1-phosphate enolase
						MTJW_09830	969420	970262	1	TIM-barrel signal transduction protein
					comB_2	MTJW_09840	970290	971045	1	putative 2-phosphosulfolactate phosphatase
						MTJW_09850	971072	972415	1	hypothetical protein
						MTJW_09860	972947	973780	1	TIM-barrel signal transduction protein
						MTJW_09870	973972	974280	1	hypothetical protein
6	1087202	1101672	14470	Predicted by at least one method	Int-Tn	MTJW_11060	1087202	1088383	-1	transposase from transposon Tn916
						MTJW_11070	1088527	1088751	-1	hypothetical protein
						MTJW_11080	1088755	1088949	-1	YcfA-like protein
						MTJW_11090	1088946	1089167	-1	hypothetical protein
						MTJW_11100	1089347	1089574	1	hypothetical protein
						MTJW_11110	1089868	1090914	1	hypothetical protein
						MTJW_11120	1090959	1091228	-1	hypothetical protein
						MTJW_11130	1092102	1092305	1	hypothetical protein
						MTJW_11140	1092359	1095991	-1	hypothetical protein
						MTJW_11150	1096044	1096352	-1	hypothetical protein
						MTJW_11160	1096291	1096509	-1	hypothetical protein
						MTJW_11170	1096506	1096934	-1	hypothetical protein
						MTJW_11180	1097095	1097358	-1	hypothetical protein
						MTJW_11190	1097340	1097768	-1	hypothetical protein
						MTJW_11200	1098109	1100034	-1	DNA repair protein RadA
						MTJW_11210	1100187	1100354	-1	hypothetical protein
						MTJW_11220	1100473	1101672	1	hypothetical protein
7	1385167	1399968	14801	Predicted by at least one method		MTJW_14050	1385167	1385271	1	manganese containing catalase
						MTJW_14060	1385745	1386632	1	hypothetical protein
						MTJW_14070	1386674	1387402	1	hypothetical protein
						MTJW_14080	1387711	1389318	-1	recombinase
						MTJW_14090	1389315	1389494	-1	hypothetical protein
						MTJW_14100	1389603	1390328	-1	hypothetical protein
						MTJW_14110	1390499	1390738	-1	helix-turn-helix domain protein
					immR_1	MTJW_14120	1390891	1391268	1	HTH-type transcriptional regulator ImmR
						MTJW_14130	1391332	1392078	1	hypothetical protein
						MTJW_14140	1392187	1392681	1	hypothetical protein
						MTJW_14150	1392603	1393343	-1	FRG domain protein
						MTJW_14160	1393412	1394410	1	hypothetical protein
						MTJW_14170	1395040	1395174	1	hypothetical protein
						MTJW_14180	1395828	1396169	-1	hypothetical protein
						MTJW_14190	1396353	1396709	-1	hypothetical protein
						MTJW_14200	1396702	1396938	-1	hypothetical protein
						MTJW_14210	1397294	1398448	-1	hypothetical protein
						MTJW_14220	1398640	1399197	-1	hypothetical protein
						MTJW_14230	1399229	1399579	-1	hypothetical protein
						MTJW_14240	1399618	1399968	-1	hypothetical protein
8	1579111	1590646	11535	Predicted by at least one method	tnpR	MTJW_16110	1579111	1580751	-1	transposon gamma-delta resolvase
						MTJW_16120	1580729	1580932	-1	hypothetical protein
						MTJW_16130	1581153	1581407	-1	hypothetical protein
						MTJW_16140	1581456	1581842	-1	HEPN domain protein
						MTJW_16150	1581839	1582204	-1	nucleotidyltransferase domain protein
						MTJW_16160	1582267	1582608	-1	nucleotidyltransferase domain protein
						MTJW_16170	1582572	1582967	-1	HEPN domain protein
						MTJW_16180	1583093	1583278	-1	hypothetical protein
						MTJW_16190	1583437	1583670	-1	HEPN domain protein
						MTJW_16200	1583660	1583974	-1	nucleotidyltransferase domain protein
						MTJW_16210	1584468	1584752	-1	hypothetical protein
					dcuS_1	MTJW_16220	1585156	1585989	-1	sensor histidine kinase DcuS
						MTJW_16230	1585999	1586475	-1	hypothetical protein
						MTJW_16240	1586505	1586627	-1	hypothetical protein
					agrB	MTJW_16250	1586630	1587184	-1	accessory protein regulator protein B
						MTJW_16260	1587426	1587953	-1	flagellar assembly protein H
					sigK	MTJW_16270	1588078	1588737	-1	RNA polymerase sigma-28 factor precursor
						MTJW_16280	1588930	1589064	1	hypothetical protein
						MTJW_16290	1589303	1590646	-1	VWA domain containing CoxE-like protein
9	1871268	1887872	16604	Predicted by at least one method		MTJW_18990	1870261	1871271	-1	hypothetical protein
					rpoE	MTJW_19000	1871268	1871882	-1	ECF RNA polymerase sigma-E factor
						MTJW_19020	1872162	1873406	-1	putative prophage phiRv2 integrase
						MTJW_19030	1873418	1873624	-1	helix-turn-helix domain protein
						MTJW_19040	1874126	1876216	-1	TrbL/VirB6 plasmid conjugal transfer protein
					xerC_4	MTJW_19050	1876245	1877129	-1	tyrosine recombinase XerC
					xerC_5	MTJW_19060	1877145	1877477	-1	tyrosine recombinase XerC
						MTJW_19070	1877957	1878244	-1	hypothetical protein
						MTJW_19080	1878246	1878467	-1	hypothetical protein
						MTJW_19090	1878515	1878859	-1	hypothetical protein
						MTJW_19100	1879115	1879573	1	hypothetical protein
						MTJW_19110	1879554	1880030	-1	hypothetical protein
						MTJW_19120	1880203	1882620	-1	hypothetical protein
						MTJW_19130	1882633	1883457	-1	hypothetical protein
						MTJW_19140	1883586	1884212	-1	hypothetical protein
						MTJW_19150	1884196	1884420	-1	hypothetical protein
						MTJW_19160	1884417	1884818	-1	hypothetical protein
					dnaC_2	MTJW_19170	1885041	1886279	-1	replicative DNA helicase
						MTJW_19180	1886583	1887872	-1	hypothetical protein

## Sheet: M. thermoacetica DSM521T
Table S3: Genomic islands (M. thermoacetica DSM521T)
Island No.	Island start	Island end	Length (bp)	Method	Gene ID	Locus	Gene start	Gene end	Strand	Product
1	158594	181031	22437	Predicted by at least one method	ytpB	MOTHE_c01690	157533	158597	1	Tetraprenyl-beta-curcumene synthase
					hepT_1	MOTHE_c01700	158594	159556	-1	Heptaprenyl diphosphate synthase component 2
					ctsR	MOTHE_c01710	159985	160353	1	Transcriptional regulator CtsR
						MOTHE_c01720	160368	160877	1	UvrB/uvrC motif protein
						MOTHE_c01730	160874	161926	1	Putative ATP:guanido phosphotransferase
					clpC	MOTHE_c01740	161968	164490	1	Negative regulator of genetic competence ClpC/MecB
					rfbB	MOTHE_c01750	164589	165353	1	dTDP-glucose 4,6-dehydratase
					rmlD	MOTHE_c01760	165384	166124	1	dTDP-4-dehydrorhamnose reductase
					rfbC	MOTHE_c01770	166121	166576	1	dTDP-4-dehydrorhamnose 3,5-epimerase
					rmlA_1	MOTHE_c01780	166593	166823	1	Glucose-1-phosphate thymidylyltransferase
						MOTHE_c01790	166881	167333	1	glucose-1-phosphate adenylyltransferase
						MOTHE_c01800	167416	167676	1	hypothetical protein
						MOTHE_c01810	168166	168552	1	hypothetical protein
						MOTHE_c01820	168555	168776	1	hypothetical protein
						MOTHE_c01830	169428	170453	1	hypothetical protein
						MOTHE_c01840	170589	171203	1	hypothetical protein
						MOTHE_c01850	171200	171856	1	hypothetical protein
						MOTHE_c01860	171810	173999	1	recombination protein F
						MOTHE_c01870	174248	175201	1	Putative transposase, YhgA-like
						MOTHE_c01880	175404	175646	1	hypothetical protein
					vapC_1	MOTHE_c01890	175636	176070	1	tRNA(fMet)-specific endonuclease VapC
						MOTHE_c01900	176084	176359	1	Helix-turn-helix domain protein
						MOTHE_c01910	176352	176843	1	Nucleotidyltransferase domain protein
						MOTHE_c01920	176782	177168	1	hypothetical protein
						MOTHE_c01930	177941	178918	1	Putative transposase, YhgA-like
						MOTHE_c01940	179357	179641	1	Helix-turn-helix domain protein
						MOTHE_c01950	179638	180117	1	hypothetical protein
						MOTHE_c01960	180164	180598	1	hypothetical protein
						MOTHE_c01970	180588	181031	1	hypothetical protein
2	234818	254268	19450	Predicted by at least one method	tkt	MOTHE_c02500	234818	235633	1	Transketolase
					dxs_1	MOTHE_c02510	235877	236812	1	1-deoxy-D-xylulose-5-phosphate synthase
						MOTHE_c02520	236979	238013	-1	putative transposase
					immR_1	MOTHE_c02530	238444	238791	-1	HTH-type transcriptional regulator ImmR
						MOTHE_c02540	238927	239172	1	anaerobic benzoate catabolism transcriptional regulator
					endo I	MOTHE_c02550	239407	242838	1	Chitodextrinase precursor
						MOTHE_c02560	242863	244473	1	Bacterial Ig-like domain (group 2)
						MOTHE_c02570	244582	245553	1	hypothetical protein
					ancA_1	MOTHE_c02580	245616	246527	1	Cellulosome-anchoring protein precursor
					ftsE	MOTHE_c02590	246973	247665	1	Cell division ATP-binding protein FtsE
					ftsX	MOTHE_c02600	247655	248542	1	Cell division protein FtsX
					mepM	MOTHE_c02610	248569	249702	1	Murein DD-endopeptidase MepM
					ctpB	MOTHE_c02620	249769	250932	1	Carboxy-terminal processing protease CtpB precursor
						MOTHE_c02630	251032	251589	1	N-carbamoylsarcosine amidase
						MOTHE_c02640	251818	252033	1	hypothetical protein
						MOTHE_c02650	252030	252260	1	YcfA-like protein
					uvrB	MOTHE_c02660	252277	254268	1	UvrABC system protein B
3	288705	304779	16074	Predicted by at least one method		MOTHE_c02980	288705	289076	1	hypothetical protein
						MOTHE_c03010	289671	289841	1	hypothetical protein
					hxlR	MOTHE_c03020	289938	290309	-1	HTH-type transcriptional activator HxlR
						MOTHE_c03030	290446	291012	1	Iron-sulfur flavoprotein
					kdgR_1	MOTHE_c03040	291645	292409	1	Transcriptional regulator KdgR
					padE	MOTHE_c03050	292696	293244	1	NADH-dependent phenylglyoxylate dehydrogenase subunit gamma
					porD_1	MOTHE_c03060	293198	293518	1	Pyruvate synthase subunit PorD
					porA_1	MOTHE_c03070	293519	294736	1	Pyruvate synthase subunit PorA
					padI	MOTHE_c03080	294729	295604	1	NADH-dependent phenylglyoxylate dehydrogenase subunit beta
					sucD_1	MOTHE_c03090	295601	297724	1	Succinyl-CoA ligase [ADP-forming] subunit alpha
					bsdC	MOTHE_c03100	297737	299167	1	Phenolic acid decarboxylase subunit C
					bsdD	MOTHE_c03110	299167	299394	1	Phenolic acid decarboxylase subunit D
					sdcS_1	MOTHE_c03120	299565	300977	1	Sodium-dependent dicarboxylate transporter SdcS
					mcpC	MOTHE_c03130	301521	302996	1	Methyl-accepting chemotaxis protein McpC
					acsE_1	MOTHE_c03140	303151	303912	1	5-methyltetrahydrofolate:corrinoid/iron-sulfur protein co-methyltransferase
						MOTHE_c03150	304021	304779	-1	transposase
						MOTHE_c03160	304776	306263	-1	Integrase core domain protein
4	571841	594934	23093	Predicted by at least one method	pckA_1	MOTHE_c05840	571841	573418	1	Phosphoenolpyruvate carboxykinase [ATP]
						MOTHE_c05850	573975	574865	1	hypothetical protein
						MOTHE_c05860	574873	575496	1	hypothetical protein
						MOTHE_c05870	575513	575725	1	hypothetical protein
						MOTHE_c05880	575791	576564	-1	IS2 transposase TnpB
						MOTHE_c05890	576720	577061	-1	Transposase
						MOTHE_c05900	577113	578033	-1	Integrase core domain protein
						MOTHE_c05910	578164	579309	1	hypothetical protein
						MOTHE_c05920	579340	579504	1	hypothetical protein
						MOTHE_c05930	579646	581454	-1	Trehalase
						MOTHE_c05940	581779	582198	-1	PIN domain protein
						MOTHE_c05950	582195	582473	-1	Phd_YefM
						MOTHE_c05960	582720	583088	1	hypothetical protein
						MOTHE_c05970	583066	583434	1	hypothetical protein
					ancA_2	MOTHE_c05980	583715	585697	1	Cellulosome-anchoring protein precursor
						MOTHE_c05990	586101	586349	1	hypothetical protein
						MOTHE_c06000	586449	586706	1	hypothetical protein
					rmlA_2	MOTHE_c06010	586703	586927	1	Glucose-1-phosphate thymidylyltransferase
					tagG	MOTHE_c06020	586971	587789	1	Teichoic acid translocation permease protein TagG
					tagH	MOTHE_c06030	587791	588546	1	Teichoic acids export ATP-binding protein TagH
					tuaH	MOTHE_c06040	588856	591675	1	Putative teichuronic acid biosynthesis glycosyltransferase TuaH
						MOTHE_c06050	591691	593157	1	hypothetical protein
					kanE	MOTHE_c06060	593334	594479	1	Alpha-D-kanosaminyltransferase
					algC	MOTHE_c06070	594551	594934	1	Phosphomannomutase/phosphoglucomutase
5	602568	618210	15642	Predicted by at least one method		MOTHE_c06160	602568	602687	-1	hypothetical protein
					recD	MOTHE_c06170	602905	605085	1	RecBCD enzyme subunit RecD
					topA_1	MOTHE_c06180	605037	606029	1	DNA topoisomerase 1
						MOTHE_c06190	606220	606840	1	hypothetical protein
						MOTHE_c06200	607535	607798	1	hypothetical protein
					vapC_2	MOTHE_c06210	607770	608246	1	tRNA(fMet)-specific endonuclease VapC
						MOTHE_c06220	608866	609291	-1	hypothetical protein
						MOTHE_c06230	609382	609780	-1	Putative transposase, YhgA-like
					galE_2	MOTHE_c06240	609916	610596	1	UDP-glucose 4-epimerase
						MOTHE_c06250	610928	611389	-1	PIN domain protein
						MOTHE_c06260	611377	611625	-1	SpoVT / AbrB like domain protein
						MOTHE_c06270	612110	612382	1	hypothetical protein
						MOTHE_c06280	612382	612768	1	Ribonuclease VapC20
					rpfG_2	MOTHE_c06290	613017	615527	-1	Cyclic di-GMP phosphodiesterase response regulator RpfG
						MOTHE_c06300	615531	616679	-1	FIST N domain protein
						MOTHE_c06310	617014	617148	1	hypothetical protein
					yedW	MOTHE_c06320	617398	618210	1	putative transcriptional regulatory protein YedW
6	1498596	1502861	4265	Predicted by at least one method	tnpR	MOTHE_c15530	1498596	1500236	-1	Transposon gamma-delta resolvase
						MOTHE_c15540	1500214	1500417	-1	hypothetical protein
						MOTHE_c15550	1500586	1500915	-1	hypothetical protein
						MOTHE_c15560	1500964	1501350	-1	HEPN domain protein
						MOTHE_c15570	1501347	1501682	-1	Nucleotidyltransferase domain protein
						MOTHE_c15580	1502197	1502328	-1	hypothetical protein
						MOTHE_c15590	1502383	1502682	-1	hypothetical protein
						MOTHE_c15600	1502637	1502861	-1	hypothetical protein
7	1541370	1553873	12503	Predicted by at least one method		MOTHE_c16090	1541068	1541373	1	Transposase
						MOTHE_c16100	1541370	1542074	1	Integrase core domain protein
						MOTHE_c16110	1542071	1542244	1	hypothetical protein
						MOTHE_c16120	1542972	1543415	-1	hypothetical protein
						MOTHE_c16130	1544033	1544374	-1	hypothetical protein
						MOTHE_c16140	1544331	1545278	-1	Transposase
						MOTHE_c16150	1545563	1545799	-1	RNA polymerase sigma factor
						MOTHE_c16160	1545805	1546416	-1	hypothetical protein
						MOTHE_c16170	1546842	1546964	-1	hypothetical protein
						MOTHE_c16180	1547301	1547915	-1	hypothetical protein
						MOTHE_c16190	1548222	1548422	-1	hypothetical protein
						MOTHE_c16200	1548537	1548821	-1	hypothetical protein
						MOTHE_c16210	1549318	1550265	1	Transposase
						MOTHE_c16220	1550222	1550563	1	hypothetical protein
						MOTHE_c16230	1551162	1551971	-1	hypothetical protein
						MOTHE_c16240	1552315	1552437	-1	hypothetical protein
						MOTHE_c16250	1552445	1553077	-1	Putative AgrB-like protein
					ypdB	MOTHE_c16260	1553136	1553873	-1	Transcriptional regulatory protein YpdB
8	1745128	1757973	12845	Predicted by at least one method		MOTHE_c18140	1745128	1746300	-1	Putative prophage phiRv2 integrase
						MOTHE_c18150	1746423	1746647	-1	hypothetical protein
						MOTHE_c18160	1746674	1746922	-1	hypothetical protein
						MOTHE_c18170	1747251	1747478	-1	hypothetical protein
						MOTHE_c18180	1747926	1749041	1	Transposase IS116/IS110/IS902 family protein
						MOTHE_c18190	1749392	1749619	1	hypothetical protein
						MOTHE_c18200	1749912	1750958	1	hypothetical protein
						MOTHE_c18210	1751003	1751998	-1	hypothetical protein
						MOTHE_c18220	1752295	1752537	-1	hypothetical protein
						MOTHE_c18230	1752476	1752694	-1	hypothetical protein
						MOTHE_c18240	1752691	1753119	-1	hypothetical protein
						MOTHE_c18250	1753215	1753304	-1	hypothetical protein
						MOTHE_c18260	1753304	1753816	-1	hypothetical protein
						MOTHE_c18270	1753838	1754110	-1	hypothetical protein
					dnaG_2	MOTHE_c18280	1754573	1756645	-1	DNA primase
						MOTHE_c18290	1756677	1756895	-1	hypothetical protein
						MOTHE_c18300	1757404	1757973	1	hypothetical protein
9	2134461	2158313	23852	Predicted by at least one method		MOTHE_c21920	2134461	2134646	-1	hypothetical protein
						MOTHE_c21930	2135127	2137001	-1	hypothetical protein
					celH_2	MOTHE_c21940	2137136	2138695	-1	Endoglucanase H precursor
						MOTHE_c21950	2138668	2139276	-1	putative 5-formyltetrahydrofolate cyclo-ligase
						MOTHE_c21960	2140263	2140823	-1	hypothetical protein
						MOTHE_c21970	2140860	2141561	-1	Helix-turn-helix domain protein
						MOTHE_c21980	2142049	2142630	1	Transposase
						MOTHE_c21990	2142597	2142995	1	Transposase IS116/IS110/IS902 family protein
						MOTHE_c22000	2142952	2143293	1	hypothetical protein
					ancA_3	MOTHE_c22010	2143848	2145737	1	Cellulosome-anchoring protein precursor
					xerC_2	MOTHE_c22020	2146141	2146311	-1	Tyrosine recombinase XerC
					xerC_3	MOTHE_c22030	2146354	2147019	-1	Tyrosine recombinase XerC
						MOTHE_c22040	2147145	2147288	-1	hypothetical protein
						MOTHE_c22050	2147285	2147494	-1	hypothetical protein
					pleD_2	MOTHE_c22060	2147582	2148589	-1	Response regulator PleD
					yeaJ_1	MOTHE_c22070	2148713	2149531	-1	Putative diguanylate cyclase YeaJ
					rpfG_7	MOTHE_c22080	2149768	2151858	-1	Cyclic di-GMP phosphodiesterase response regulator RpfG
					yeaJ_2	MOTHE_c22090	2151955	2152782	-1	Putative diguanylate cyclase YeaJ
					copR	MOTHE_c22100	2153071	2153883	-1	Transcriptional activator protein CopR
						MOTHE_c22110	2154373	2155371	1	putative transposase
					pgaC	MOTHE_c22120	2156258	2157478	1	Poly-beta-1,6-N-acetyl-D-glucosamine synthase
						MOTHE_c22130	2157789	2158313	-1	hypothetical protein
10	2209483	2240645	31162	Predicted by at least one method	acsC_2	MOTHE_c22750	2209483	2209998	-1	Corrinoid/iron-sulfur protein large subunit
					sufS	MOTHE_c22760	2210097	2211248	-1	Cysteine desulfurase
						MOTHE_c22770	2211352	2211684	-1	hypothetical protein
						MOTHE_c22780	2211688	2212107	-1	DGC domain protein
						MOTHE_c22790	2212131	2212553	-1	DGC domain protein
					gcvH_3	MOTHE_c22800	2212540	2213412	-1	Glycine cleavage system H protein
						MOTHE_c22810	2213415	2213702	-1	hypothetical protein
						MOTHE_c22820	2213695	2214072	-1	hypothetical protein
					hsrA	MOTHE_c22830	2214561	2214734	1	putative transport protein HsrA
						MOTHE_c22840	2214853	2215392	1	Major Facilitator Superfamily protein
						MOTHE_c22850	2215416	2215565	1	hypothetical protein
						MOTHE_c22860	2215692	2215862	-1	hypothetical protein
						MOTHE_c22870	2216035	2217162	1	Transcriptional regulator PadR-like family protein
					ykfC	MOTHE_c22880	2217286	2218215	-1	Gamma-D-glutamyl-L-lysine endopeptidase
						MOTHE_c22890	2218386	2219585	-1	hypothetical protein
						MOTHE_c22900	2219597	2219935	-1	4-amino-4-deoxy-L-arabinose-phosphoundecaprenol flippase subunit ArnF
						MOTHE_c22910	2219948	2220313	-1	hypothetical protein
						MOTHE_c22920	2220454	2221143	-1	Undecaprenyl-phosphate mannosyltransferase
						MOTHE_c22930	2222170	2223042	-1	Integrase core domain protein
						MOTHE_c22940	2223032	2223322	-1	Transposase
					ltrA	MOTHE_c22950	2223870	2225105	1	Group II intron-encoded protein LtrA
						MOTHE_c22960	2225184	2226614	1	hypothetical protein
						MOTHE_c22970	2226585	2227196	-1	hypothetical protein
						MOTHE_c22980	2227220	2227855	-1	hypothetical protein
						MOTHE_c22990	2227848	2228777	-1	hypothetical protein
						MOTHE_c23000	2228791	2229768	-1	hypothetical protein
					queC	MOTHE_c23010	2229731	2230309	-1	7-cyano-7-deazaguanine synthase
						MOTHE_c23020	2230420	2232468	-1	hypothetical protein
						MOTHE_c23030	2232471	2234825	-1	hypothetical protein
						MOTHE_c23040	2234828	2235889	-1	hypothetical protein
						MOTHE_c23050	2236109	2237596	1	Integrase core domain protein
						MOTHE_c23060	2237593	2238351	1	transposase
						MOTHE_c23070	2238450	2240645	-1	N-6 DNA Methylase
						MOTHE_c24010	2345623	2345835	-1	hypothetical protein
						MOTHE_c24020	2345835	2346092	-1	hypothetical protein
					mdtN_2	MOTHE_c24030	2346347	2347543	1	Multidrug resistance protein MdtN
					ybhF_3	MOTHE_c24040	2347543	2348250	1	putative ABC transporter ATP-binding protein YbhF
					ybhR_1	MOTHE_c24050	2348243	2349382	1	Inner membrane transport permease YbhR
					ybhR_2	MOTHE_c24060	2349396	2350595	1	Inner membrane transport permease YbhR
					nicS	MOTHE_c24070	2350675	2351283	1	HTH-type transcriptional repressor NicS
					vapC_4	MOTHE_c24080	2351323	2351736	-1	tRNA(fMet)-specific endonuclease VapC
						MOTHE_c24090	2351733	2352152	-1	antitoxin YefM
						MOTHE_c24100	2352254	2353810	-1	hypothetical protein
						MOTHE_c24110	2354013	2355206	-1	Transposase IS66 family protein
						MOTHE_c24120	2355196	2355480	-1	Transposase C of IS166 homeodomain protein
						MOTHE_c24130	2355667	2356023	-1	IS66 Orf2 like protein
						MOTHE_c24140	2356017	2356340	-1	hypothetical protein
					xynA	MOTHE_c24150	2356727	2358310	-1	Endo-1,4-beta-xylanase A precursor
						MOTHE_c24160	2358498	2359625	-1	Outer membrane efflux protein
						MOTHE_c24170	2359708	2361963	-1	hypothetical protein
						MOTHE_c24180	2362767	2362898	-1	hypothetical protein

## Sheet: M. thermoacetica DSM2955T
Table S3: Genomic islands (M. thermoacetica DSM2955T)
Island No.	Island start	Island end	Length (bp)	Method	Gene ID	Locus	Gene start	Gene end	Strand	Product
1	158592	181029	22437	Predicted by at least one method	ytpB	MOTHA_c01690	157531	158595	1	tetraprenyl-beta-curcumene synthase
					hepT1	MOTHA_c01700	158592	159554	-1	heptaprenyl diphosphate synthase component 2
					ctsR	MOTHA_c01710	159983	160351	1	transcriptional regulator CtsR
						MOTHA_c01720	160366	160875	1	UvrB/uvrC motif protein
						MOTHA_c01730	160872	161924	1	putative ATP:guanido phosphotransferase
					clpC	MOTHA_c01740	161966	164488	1	negative regulator of genetic competence ClpC/MecB
					rfbB	MOTHA_c01750	164587	165351	1	dTDP-glucose 4,6-dehydratase
					rmlD	MOTHA_c01760	165382	166122	1	dTDP-4-dehydrorhamnose reductase
					rfbC	MOTHA_c01770	166119	166574	1	dTDP-4-dehydrorhamnose 3,5-epimerase
					rmlA1	MOTHA_c01780	166591	166821	1	glucose-1-phosphate thymidylyltransferase
					glgC	MOTHA_c01790	166879	167331	1	glucose-1-phosphate adenylyltransferase
						MOTHA_c01800	167414	167674	1	hypothetical protein
						MOTHA_c01810	168164	168550	1	hypothetical protein
						MOTHA_c01820	168553	168774	1	hypothetical protein
						MOTHA_c01830	169426	171201	1	hypothetical protein
						MOTHA_c01840	171198	171854	1	hypothetical protein
					recF2	MOTHA_c01850	171808	173997	1	DNA replication and repair protein RecF
						MOTHA_c01860	174246	175199	1	putative transposase, YhgA-like
						MOTHA_c01870	175402	175644	1	hypothetical protein
					vapC1	MOTHA_c01880	175634	176068	1	tRNA(fMet)-specific endonuclease VapC
						MOTHA_c01890	176082	176357	1	helix-turn-helix domain protein
						MOTHA_c01900	176350	176841	1	nucleotidyltransferase domain protein
						MOTHA_c01910	176780	177166	1	hypothetical protein
						MOTHA_c01920	177939	178916	1	putative transposase, YhgA-like
						MOTHA_c01930	179355	179639	1	helix-turn-helix domain protein
						MOTHA_c01940	179636	180115	1	hypothetical protein
						MOTHA_c01950	180162	180596	1	hypothetical protein
						MOTHA_c01960	180586	181029	1	hypothetical protein
2	234817	254379	19562	Predicted by at least one method	tkt	MOTHA_c02480	234817	235632	1	transketolase
					dxs1	MOTHA_c02490	235876	236811	1	1-deoxy-D-xylulose-5-phosphate synthase
						MOTHA_c02500	236978	238012	-1	putative transposase
					immR1	MOTHA_c02510	238443	238790	-1	HTH-type transcriptional regulator ImmR
						MOTHA_c02520	238926	239171	1	anaerobic benzoate catabolism transcriptional regulator
					endo I	MOTHA_c02530	239406	242837	1	chitodextrinase precursor
						MOTHA_c02540	242862	244472	1	bacterial Ig-like domain (group 2)
					ancA1	MOTHA_c02550	244581	246638	1	cellulosome-anchoring protein precursor
					ftsE	MOTHA_c02560	247084	247776	1	cell division ATP-binding protein FtsE
					ftsX	MOTHA_c02570	247766	248653	1	cell division protein FtsX
					mepM1	MOTHA_c02580	248680	249813	1	murein DD-endopeptidase MepM
					ctpB	MOTHA_c02590	249880	251043	1	carboxy-terminal processing protease CtpB precursor
						MOTHA_c02600	251143	251700	1	N-carbamoylsarcosine amidase
						MOTHA_c02610	251929	252144	1	hypothetical protein
						MOTHA_c02620	252141	252371	1	YcfA-like protein
					uvrB	MOTHA_c02630	252388	254379	1	UvrABC system protein B
3	286102	307390	21288	Predicted by at least one method		MOTHA_c02910	286102	286848	-1	hypothetical protein
					immR2	MOTHA_c02920	286912	287298	-1	HTH-type transcriptional regulator ImmR
						MOTHA_c02930	287493	287741	1	hypothetical protein
						MOTHA_c02940	287960	288181	1	hypothetical protein
						MOTHA_c02950	288268	288735	1	hypothetical protein
						MOTHA_c02960	288747	288977	-1	hypothetical protein
						MOTHA_c02970	289165	289317	1	hypothetical protein
						MOTHA_c02980	289439	289714	1	bacterial regulatory proteins, luxR family
					puuR1	MOTHA_c02990	289711	290016	-1	HTH-type transcriptional regulator PuuR
						MOTHA_c03000	290439	291767	1	sigma-70, region 4
						MOTHA_c03010	291764	292177	1	hypothetical protein
						MOTHA_c03020	292223	292444	1	hypothetical protein
						MOTHA_c03030	292716	293078	1	hypothetical protein
					dnaA2	MOTHA_c03040	293266	294024	-1	chromosomal replication initiator protein DnaA
						MOTHA_c03050	294021	295508	-1	integrase core domain protein
						MOTHA_c03060	295983	296252	1	hypothetical protein
					ftsH2	MOTHA_c03070	296659	297771	1	ATP-dependent zinc metalloprotease FtsH 2
						MOTHA_c03080	297775	298842	1	hypothetical protein
						MOTHA_c03090	298877	299605	-1	IS2 transposase TnpB
						MOTHA_c03100	299806	300147	-1	transposase
						MOTHA_c03110	300221	301498	1	subtilase family protein
						MOTHA_c03120	301603	301728	1	hypothetical protein
					recA1	MOTHA_c03130	302015	303034	-1	protein RecA
						MOTHA_c03140	303153	303581	-1	hypothetical protein
						MOTHA_c03150	303669	303902	-1	YcfA-like protein
						MOTHA_c03160	303899	304240	-1	hypothetical protein
					rghR	MOTHA_c03170	304272	304712	-1	HTH-type transcriptional repressor RghR
						MOTHA_c03180	304865	305140	1	hypothetical protein
						MOTHA_c03190	305365	305586	1	hypothetical protein
						MOTHA_c03200	305857	306417	1	hypothetical protein
						MOTHA_c03210	306797	307390	-1	hypothetical protein
4	657863	678046	20183	Predicted by at least one method		MOTHA_c06740	657863	658753	1	hypothetical protein
						MOTHA_c06750	658761	659384	1	hypothetical protein
						MOTHA_c06760	659401	659856	1	hypothetical protein
						MOTHA_c06770	659849	663460	1	hypothetical protein
						MOTHA_c06780	663486	666044	1	DNA methylase
					rapA1	MOTHA_c06790	666048	668966	1	RNA polymerase-associated protein RapA
						MOTHA_c06800	668963	670501	1	PglZ domain protein
						MOTHA_c06810	670554	671294	1	hypothetical protein
					cobB1	MOTHA_c06820	671319	674870	1	NAD-dependent protein deacetylase
					dnaA3	MOTHA_c06830	675323	676081	-1	chromosomal replication initiator protein DnaA
						MOTHA_c06840	676078	676707	-1	hypothetical protein
						MOTHA_c06850	676776	677504	-1	IS2 transposase TnpB
						MOTHA_c06860	677705	678046	-1	transposase
5	1640898	1653401	12503	Predicted by at least one method		MOTHA_c16920	1640596	1640901	1	transposase
						MOTHA_c16930	1640898	1641602	1	integrase core domain protein
						MOTHA_c16940	1641599	1641772	1	hypothetical protein
						MOTHA_c16950	1642500	1642943	-1	hypothetical protein
						MOTHA_c16960	1643561	1643902	-1	hypothetical protein
						MOTHA_c16970	1643859	1644806	-1	transposase
					rpoD	MOTHA_c16980	1645091	1645327	-1	RNA polymerase sigma factor RpoD
						MOTHA_c16990	1645333	1645944	-1	hypothetical protein
						MOTHA_c17000	1646370	1646492	-1	hypothetical protein
						MOTHA_c17010	1646829	1647443	-1	hypothetical protein
						MOTHA_c17020	1647750	1647950	-1	hypothetical protein
						MOTHA_c17030	1648065	1648349	-1	hypothetical protein
						MOTHA_c17040	1648846	1649793	1	transposase
						MOTHA_c17050	1649750	1650091	1	hypothetical protein
						MOTHA_c17060	1650690	1651499	-1	hypothetical protein
						MOTHA_c17070	1651843	1651965	-1	hypothetical protein
						MOTHA_c17080	1651973	1652605	-1	putative AgrB-like protein
					ypdB	MOTHA_c17090	1652664	1653401	-1	transcriptional regulatory protein YpdB
6	1844655	1857500	12845	Predicted by at least one method		MOTHA_c18970	1844655	1845827	-1	putative prophage phiRv2 integrase
						MOTHA_c18980	1845950	1846174	-1	hypothetical protein
						MOTHA_c18990	1846201	1846449	-1	hypothetical protein
						MOTHA_c19000	1846778	1847005	-1	hypothetical protein
						MOTHA_c19010	1847453	1848568	1	transposase IS116/IS110/IS902 family protein
						MOTHA_c19020	1848919	1849146	1	hypothetical protein
						MOTHA_c19030	1849439	1850485	1	hypothetical protein
						MOTHA_c19040	1850530	1851525	-1	hypothetical protein
						MOTHA_c19050	1851765	1852064	-1	hypothetical protein
						MOTHA_c19060	1852003	1852221	-1	hypothetical protein
						MOTHA_c19070	1852218	1852646	-1	hypothetical protein
						MOTHA_c19080	1852742	1852831	-1	hypothetical protein
						MOTHA_c19090	1852831	1853343	-1	hypothetical protein
						MOTHA_c19100	1853365	1853637	-1	hypothetical protein
					dnaG2	MOTHA_c19110	1854100	1856172	-1	DNA primase
						MOTHA_c19120	1856204	1856422	-1	hypothetical protein
						MOTHA_c19130	1856931	1857500	1	hypothetical protein
7	2234453	2254098	19645	Predicted by at least one method		MOTHA_c22680	2233824	2234480	-1	hypothetical protein
						MOTHA_c22690	2234453	2235061	-1	putative 5-formyltetrahydrofolate cyclo-ligase
						MOTHA_c22700	2236048	2236608	-1	hypothetical protein
						MOTHA_c22710	2236645	2237346	-1	helix-turn-helix domain protein
						MOTHA_c22720	2237834	2238415	1	transposase
						MOTHA_c22730	2238382	2238780	1	transposase IS116/IS110/IS902 family protein
						MOTHA_c22740	2238737	2239078	1	hypothetical protein
					ancA3	MOTHA_c22750	2239633	2241522	1	cellulosome-anchoring protein precursor
					xerC2	MOTHA_c22760	2241926	2242096	-1	tyrosine recombinase XerC
					xerC3	MOTHA_c22770	2242139	2242804	-1	tyrosine recombinase XerC
						MOTHA_c22780	2242930	2243073	-1	hypothetical protein
						MOTHA_c22790	2243070	2243279	-1	hypothetical protein
					pleD2	MOTHA_c22800	2243367	2244374	-1	response regulator PleD
					yeaJ1	MOTHA_c22810	2244498	2245316	-1	putative diguanylate cyclase YeaJ
					rpfG7	MOTHA_c22820	2245553	2247643	-1	cyclic di-GMP phosphodiesterase response regulator RpfG
					yeaJ2	MOTHA_c22830	2247740	2248567	-1	putative diguanylate cyclase YeaJ
					copR	MOTHA_c22840	2248856	2249668	-1	transcriptional activator protein CopR
						MOTHA_c22850	2250158	2251156	1	putative transposase
					pgaC	MOTHA_c22860	2252043	2253263	1	poly-beta-1,6-N-acetyl-D-glucosamine synthase
						MOTHA_c22870	2253574	2254098	-1	hypothetical protein
8	2305268	2336430	31162	Predicted by at least one method	acsC2	MOTHA_c23480	2305268	2305783	-1	corrinoid/iron-sulfur protein large subunit
					sufS	MOTHA_c23490	2305882	2307033	-1	cysteine desulfurase
						MOTHA_c23500	2307137	2307469	-1	hypothetical protein
						MOTHA_c23510	2307473	2307892	-1	DGC domain protein
						MOTHA_c23520	2307916	2308338	-1	DGC domain protein
					gcvH3	MOTHA_c23530	2308325	2309197	-1	glycine cleavage system H protein
						MOTHA_c23540	2309200	2309487	-1	hypothetical protein
						MOTHA_c23550	2309480	2309857	-1	hypothetical protein
					hsrA	MOTHA_c23560	2310346	2310519	1	putative transport protein HsrA
						MOTHA_c23570	2310638	2311177	1	major facilitator superfamily protein
						MOTHA_c23580	2311201	2311350	1	hypothetical protein
						MOTHA_c23590	2311477	2311647	-1	hypothetical protein
						MOTHA_c23600	2311820	2312947	1	transcriptional regulator PadR-like family protein
					ykfC	MOTHA_c23610	2313071	2314000	-1	gamma-D-glutamyl-L-lysine endopeptidase
						MOTHA_c23620	2314171	2315370	-1	hypothetical protein
					arnE1	MOTHA_c23630	2315382	2315720	-1	4-amino-4-deoxy-L-arabinose-phosphoundecaprenol flippase subunit ArnE
						MOTHA_c23640	2315733	2316098	-1	hypothetical protein
						MOTHA_c23650	2316239	2316928	-1	undecaprenyl-phosphate mannosyltransferase
						MOTHA_c23660	2317955	2318827	-1	integrase core domain protein
						MOTHA_c23670	2318817	2319107	-1	transposase
					ltrA	MOTHA_c23680	2319655	2320890	1	group II intron-encoded protein LtrA
						MOTHA_c23690	2320969	2322399	1	hypothetical protein
						MOTHA_c23700	2322370	2322981	-1	hypothetical protein
						MOTHA_c23710	2323005	2323640	-1	hypothetical protein
						MOTHA_c23720	2323633	2324562	-1	hypothetical protein
						MOTHA_c23730	2324576	2325553	-1	hypothetical protein
					queC	MOTHA_c23740	2325516	2326094	-1	7-cyano-7-deazaguanine synthase
						MOTHA_c23750	2326205	2328253	-1	hypothetical protein
						MOTHA_c23760	2328256	2330610	-1	hypothetical protein
						MOTHA_c23770	2330613	2331674	-1	hypothetical protein
						MOTHA_c23780	2331894	2333381	1	integrase core domain protein
					dnaA4	MOTHA_c23790	2333378	2334136	1	chromosomal replication initiator protein DnaA
						MOTHA_c23800	2334235	2336430	-1	N-6 DNA methylase
9	2441408	2458683	17275	Predicted by at least one method		MOTHA_c24730	2441408	2441620	-1	hypothetical protein
						MOTHA_c24740	2441620	2441877	-1	hypothetical protein
					mdtN2	MOTHA_c24750	2442132	2443328	1	multidrug resistance protein MdtN
					ybhF3	MOTHA_c24760	2443328	2444035	1	putative ABC transporter ATP-binding protein YbhF
					ybhR1	MOTHA_c24770	2444028	2445167	1	inner membrane transport permease YbhR
					ybhR2	MOTHA_c24780	2445181	2446380	1	inner membrane transport permease YbhR
					nicS	MOTHA_c24790	2446460	2447068	1	HTH-type transcriptional repressor NicS
					vapC5	MOTHA_c24800	2447108	2447521	-1	tRNA(fMet)-specific endonuclease VapC
						MOTHA_c24810	2447518	2447937	-1	antitoxin YefM
						MOTHA_c24820	2448039	2449595	-1	hypothetical protein
						MOTHA_c24830	2449798	2450991	-1	transposase IS66 family protein
						MOTHA_c24840	2450981	2451265	-1	transposase C of IS166 homeodomain protein
						MOTHA_c24850	2451452	2451808	-1	IS66 Orf2 like protein
						MOTHA_c24860	2451802	2452125	-1	hypothetical protein
					xynA	MOTHA_c24870	2452512	2454095	-1	endo-1,4-beta-xylanase A precursor
						MOTHA_c24880	2454283	2455410	-1	outer membrane efflux protein
						MOTHA_c24890	2455493	2457748	-1	hypothetical protein
						MOTHA_c24900	2458552	2458683	-1	hypothetical protein

## Sheet: M. thermoacetica ATCC39073
Table S3: Genomic islands (M. thermoacetica ATCC37073)
Island No.	Island start	Island end	Length (bp)	Method	Gene name	Gene ID	Locus	Gene start	Gene end	Strand	Product
1	158942	181379	22437	Predicted by at least one method	YP_429038		Moth_0157	157881	158945	1	hypothetical protein
					YP_429039		Moth_0158	158942	159904	-1	Polyprenyl synthetase
					YP_429040		Moth_0159	160333	160701	1	transcriptional repressor of class III stress genes
					YP_429041		Moth_0160	160716	161225	1	UvrB/UvrC protein
					YP_429042		Moth_0161	161222	162274	1	ATP:guanido phosphotransferase
					YP_429043		Moth_0162	162316	164838	1	ATPases with chaperone activity, ATP-binding subunit
					YP_429044		Moth_0163	164937	165701	1	NAD-dependent epimerase/dehydratase
					YP_429045		Moth_0165	166469	166924	1	dTDP-4-dehydrorhamnose 3,5-epimerase related
					YP_429046		Moth_0167	167764	168024	1	hypothetical protein
					YP_429047		Moth_0168	168514	168900	1	hypothetical protein
					YP_429048		Moth_0169	168903	169124	1	Protein of unknown function DUF433
					YP_429049		Moth_0170	169114	169506	1	hypothetical protein
					YP_429050		Moth_0171	169776	171551	1	hypothetical protein
					YP_429051		Moth_0172	171548	172204	1	hypothetical protein
					YP_429052		Moth_0173	172158	174347	1	hypothetical protein
					YP_429053		Moth_0174	174596	175549	1	hypothetical protein
					YP_429054		Moth_0175	175752	175994	1	CopG-like DNA-binding
					YP_429055		Moth_0176	175984	176418	1	hypothetical protein
					YP_429056		Moth_0177	176432	176707	1	hypothetical protein
					YP_429057		Moth_0178	176700	177191	1	DNA polymerase, beta-like region
					YP_429058		Moth_0179	177130	177516	1	Protein of unknown function DUF86
					YP_429059		Moth_0181	178289	179266	1	hypothetical protein
					YP_429060		Moth_0182	179409	179585	-1	hypothetical protein
					YP_429061		Moth_0183	179681	179989	1	Excisionase/Xis, DNA-binding
					YP_429062		Moth_0184	179986	180465	1	hypothetical protein
					YP_429063		Moth_0185	180494	180946	1	DNA polymerase, beta-like region
					YP_429064		Moth_0186	180930	181379	1	Protein of unknown function DUF86
2	283781	307740	23959	Predicted by at least one method	YP_429153		Moth_0275	283781	284248	1	SsrA-binding protein
					YP_429154		Moth_0277	286452	287198	-1	hypothetical protein
					YP_429155		Moth_0278	287262	287648	-1	transcriptional regulator, XRE family
					YP_429156		Moth_0279	287843	288091	1	transcriptional regulator, XRE family
					YP_429157		Moth_0280	288612	289085	1	hypothetical protein
					YP_429158		Moth_0281	289097	289333	-1	transcriptional regulator, XRE family
					YP_429159		Moth_0282	289419	289667	1	transcriptional regulator, XRE family
					YP_429160		Moth_0283	289789	290064	1	response regulator receiver domain protein (CheY-like)
					YP_429161		Moth_0284	290061	290366	-1	transcriptional regulator, XRE family
					YP_429162		Moth_0285	290487	290711	1	transcriptional regulator, XRE family
					YP_429163		Moth_0286	290789	292117	1	response regulator receiver domain protein (CheY-like)
					YP_429164		Moth_0287	292102	292527	1	hypothetical protein
					YP_429165		Moth_0288	293066	293428	1	hypothetical protein
					YP_429166		Moth_0289	293616	294374	-1	IstB-like ATP-binding protein
					YP_429167		Moth_0290	294371	295858	-1	Integrase, catalytic region
					YP_429168		Moth_0291	297009	298121	1	AAA ATPase
					YP_429169		Moth_0292	298125	299192	1	hypothetical protein
					YP_429170		Moth_0293	299227	300111	-1	Integrase, catalytic region
					YP_429171		Moth_0294	300156	300497	-1	Transposase IS3/IS911
					YP_429172		Moth_0295	300571	301848	1	hypothetical protein
					YP_429173		Moth_0296	302365	303384	-1	recA protein
					YP_429174		Moth_0297	303503	303931	-1	Protein of unknown function DUF955
					YP_429175		Moth_0298	304019	304252	-1	YcfA-like
					YP_429176		Moth_0299	304249	304590	-1	hypothetical protein
					YP_429177		Moth_0300	304622	305062	-1	transcriptional regulator, XRE family
					YP_429178		Moth_0301	305215	305490	1	hypothetical protein
					YP_429179		Moth_0302	306024	306767	1	hypothetical protein
					YP_429180		Moth_0303	307147	307740	-1	hypothetical protein
3	339322	367529	28207	Predicted by at least one method	YP_429212		Moth_0335	339322	340680	1	type II secretion system protein E
					YP_429213		Moth_0336	340680	341630	1	hypothetical protein
					YP_429214		Moth_0337	341627	342406	1	hypothetical protein
					YP_429215		Moth_0338	342438	342707	1	hypothetical protein
					YP_429216		Moth_0339	342981	343544	1	Peptidase A24A, prepilin type IV
					YP_429217		Moth_0340	343547	344173	1	hypothetical protein
					YP_429218		Moth_0341	344206	344844	1	hypothetical protein
					YP_429219		Moth_0342	344841	345569	1	hypothetical protein
					YP_429220		Moth_0343	345705	348446	1	hypothetical protein
					YP_429221		Moth_0344	348912	351116	1	hypothetical protein
					YP_429222		Moth_0345	351196	352242	1	hypothetical protein
					YP_429223		Moth_0346	352807	353559	1	diguanylate phosphodiesterase (EAL domain)
					YP_429224		Moth_0347	353566	354144	1	hypothetical protein
					YP_429225		Moth_0348	354239	355108	1	hypothetical protein
					YP_429226		Moth_0349	355643	357712	1	DNA topoisomerase
					YP_429227		Moth_0350	357716	358015	1	hypothetical protein
					YP_429228		Moth_0351	358003	358656	-1	hypothetical protein
					YP_429229		Moth_0352	358798	359613	1	RNA binding S1
					YP_429230		Moth_0353	359813	360208	1	hypothetical protein
					YP_429231		Moth_0354	361206	361517	1	transcriptional modulator of MazE/toxin, MazF
					YP_429232		Moth_0355	361600	361989	1	hypothetical protein
					YP_429233		Moth_0356	362044	362301	1	hypothetical protein
					YP_429234		Moth_0357	362392	363306	1	hypothetical protein
					YP_429235		Moth_0358	363360	364346	1	TOPRIM
					YP_429236		Moth_0359	364346	364771	1	hypothetical protein
					YP_429237		Moth_0360	365043	365438	-1	hypothetical protein
					YP_429238		Moth_0361	365955	366911	1	Phage integrase
					YP_429239		Moth_0362	366984	367250	1	hypothetical protein
					YP_429240		Moth_0363	367257	367529	1	molybdopterin-guanine dinucleotide biosynthesis protein A-like
4	379800	397428	17628	Predicted by at least one method	YP_429252		Moth_0375	379800	380564	1	transcriptional regulator, IclR family
					YP_429253		Moth_0376	380851	381399	1	2-oxoacid:acceptor oxidoreductase, gamma subunit, pyruvate/2-ketoisovalerate
					YP_429254		Moth_0377	381404	381673	1	2-oxoacid:acceptor oxidoreductase, delta subunit, pyruvate/2-ketoisovalerate
					YP_429255		Moth_0378	381674	382891	1	Pyruvate flavodoxin/ferredoxin oxidoreductase-like
					YP_429256		Moth_0379	382893	383759	1	Thiamine pyrophosphate enzyme
					YP_429257		Moth_0380	383756	385879	1	CoA-binding
					YP_429258		Moth_0381	385892	387322	1	Carboxylyase-related protein
					YP_429259		Moth_0382	387322	387549	1	vanillic acid non-oxidative decarboxylation gene-like
					YP_429260		Moth_0383	387720	389132	1	anion transporter
					YP_429261		Moth_0384	389553	391151	1	methyl-accepting chemotaxis sensory transducer
					YP_429262		Moth_0385	391306	392103	1	5-methyltetrahydrofolate--homocysteine S-methyltransferase
					YP_429263		Moth_0386	392221	393390	1	hypothetical protein
					YP_429264		Moth_0387	393628	394251	1	5-methyltetrahydrofolate--homocysteine S-methyltransferase
					YP_429265		Moth_0388	394988	396106	1	putative anti-sigma regulatory factor (serine/threonine protein kinase)
					YP_429266		Moth_0389	396158	396499	1	Transposase IS3/IS911
					YP_429267		Moth_0390	396544	397428	1	Integrase, catalytic region
5	412557	439537	26980	Predicted by at least one method	YP_429284		Moth_0407	412557	412925	-1	dihydroneopterin aldolase
					YP_429285		Moth_0408	412946	413503	-1	GTP cyclohydrolase I
					YP_429286		Moth_0409	413769	414779	-1	hypothetical protein
					YP_429287		Moth_0412	415717	415926	1	2-oxoisovalerate dehydrogenase, E1 component beta subunit
					YP_429288		Moth_0414	416546	416992	1	sulfonate/nitrate transport system ATP-binding protein
					YP_429289		Moth_0415	417236	417532	1	hypothetical protein
					YP_429290		Moth_0416	417846	418229	1	hypothetical protein
					YP_429291		Moth_0417	418409	419215	-1	transcriptional regulator, IclR family
					YP_429292		Moth_0418	419449	421497	-1	V-type H(+)-translocating pyrophosphatase
					YP_429293		Moth_0419	421702	422724	-1	PfkB
					YP_429294		Moth_0420	422912	423556	-1	2-dehydro-3-deoxyphosphogluconate aldolase/4-hydroxy-2-oxoglutarate aldolase
					YP_429295		Moth_0421	423987	425219	1	ROK
					YP_429296		Moth_0422	425616	426623	1	TRAP dicarboxylate transporter, DctP subunit
					YP_429297		Moth_0423	426714	427181	1	Tripartite ATP-independent periplasmic transporter, DctQ component
					YP_429298		Moth_0424	427207	428487	1	TRAP dicarboxylate transporter- DctM subunit
					YP_429299		Moth_0425	428519	429550	1	Uroporphyrinogen decarboxylase (URO-D)
					YP_429300		Moth_0426	429573	430334	1	Short-chain dehydrogenase/reductase SDR
					YP_429301		Moth_0427	430377	431627	1	hypothetical protein
					YP_429302		Moth_0428	431697	431933	1	transposase
					YP_429303		Moth_0429	432103	433719	1	Mannitol dehydrogenase
					YP_429304		Moth_0430	433790	434869	1	mannonate dehydratase
					YP_429305		Moth_0431	435306	436004	1	sugar fermentation stimulation protein
					YP_429306		Moth_0432	436345	436680	1	transcriptional regulator, ArsR family
					YP_429307		Moth_0433	436701	437054	1	DsrE-like protein
					YP_429308		Moth_0434	437085	437435	1	DsrE-like protein
					YP_429309		Moth_0435	437450	437755	1	hypothetical protein
					YP_429310		Moth_0436	437795	438022	1	SirA-like
					YP_429311		Moth_0437	438035	438511	1	pyridine nucleotide-disulphide oxidoreductase family protein
					YP_429312		Moth_0438	438562	438978	1	glycine cleavage system H protein
					YP_429313		Moth_0439	439067	439537	1	Heterodisulfide reductase subunit C-like
					YP_429314		Moth_0440	439534	440412	1	Protein of unknown function DUF224, cysteine-rich region
6	657533	677885	20352	Predicted by at least one method	YP_429505		Moth_0633	657533	659110	1	phosphoenolpyruvate carboxykinase (ATP)
					YP_429506		Moth_0635	659667	660557	1	hypothetical protein
					YP_429507		Moth_0636	660565	661188	1	hypothetical protein
					YP_429508		Moth_0637	661205	661660	1	hypothetical protein
					YP_429509		Moth_0638	661653	665264	1	hypothetical protein
					YP_429510		Moth_0639	665290	667848	1	DNA methylase N-4/N-6
					YP_429511		Moth_0640	667852	670770	1	Helicase-like
					YP_429512		Moth_0641	670767	672305	1	hypothetical protein
					YP_429513		Moth_0642	672358	673098	1	hypothetical protein
					YP_429514		Moth_0643	673123	676674	1	hypothetical protein
					YP_429515		Moth_0644	676760	677023	1	hypothetical protein
					YP_429516		Moth_0645	677127	677885	-1	IstB-like ATP-binding protein
					YP_429517		Moth_0646	677882	678511	-1	hypothetical protein
7	1643804	1659825	16021	Predicted by at least one method	YP_430457		Moth_1608	1643804	1644424	-1	Lytic transglycosylase, catalytic
					YP_430458		Moth_1610	1646168	1646473	1	Transposase IS3/IS911
					YP_430459		Moth_1612	1648072	1648524	-1	hypothetical protein
					YP_430460		Moth_1614	1651942	1652304	-1	hypothetical protein
					YP_430461		Moth_1615	1652401	1653048	-1	hypothetical protein
					YP_430462		Moth_1616	1653322	1653633	-1	hypothetical protein
					YP_430463		Moth_1617	1653637	1653930	-1	hypothetical protein
					YP_430464		Moth_1619	1656261	1657070	-1	hypothetical protein
					YP_430465		Moth_1620	1657544	1658176	-1	Accessory gene regulator B
					YP_430466		Moth_1621	1658235	1658972	-1	transcriptional regulator, LytR/AlgR family
					YP_430467		Moth_1622	1658998	1659825	-1	signal transduction histidine kinase regulating citrate/malate metabolism
8	2242428	2259882	17454	Predicted by at least one method	YP_430976		Moth_2142	2242428	2242670	-1	Excisionase/Xis, DNA-binding
					YP_430977		Moth_2143	2242961	2243425	-1	hypothetical protein
					YP_430978		Moth_2145	2245416	2247305	1	hypothetical protein
					YP_430979		Moth_2147	2248853	2249062	-1	2-oxoisovalerate dehydrogenase, E1 component beta subunit
					YP_430980		Moth_2148	2249150	2250163	-1	diguanylate cyclase (GGDEF domain) with PAS/PAC sensor
					YP_430981		Moth_2149	2250281	2251099	-1	diguanylate cyclase (GGDEF domain)
					YP_430982		Moth_2150	2251289	2253445	-1	metal dependent phosphohydrolase
					YP_430983		Moth_2151	2253524	2254351	-1	diguanylate cyclase (GGDEF domain)
					YP_430984		Moth_2152	2254640	2255461	-1	response regulator receiver domain protein (CheY-like)
					YP_430985		Moth_2153	2255942	2256940	1	hypothetical protein
					YP_430986		Moth_2154	2257647	2259047	1	Glycosyl transferase, family 2
					YP_430987		Moth_2155	2259358	2259882	-1	Transposase, IS4
9	2323739	2342214	18475	Predicted by at least one method	YP_431059		Moth_2229	2323739	2324611	-1	Integrase, catalytic region
					YP_431060		Moth_2230	2324601	2324891	-1	Transposase IS3/IS911
					YP_431061		Moth_2231	2325439	2326674	1	RNA-directed DNA polymerase (Reverse transcriptase)
					YP_431062		Moth_2232	2326753	2328183	1	hypothetical protein
					YP_431063		Moth_2233	2329417	2330346	-1	hypothetical protein
					YP_431064		Moth_2234	2330360	2331337	-1	hypothetical protein
					YP_431065		Moth_2235	2331300	2331878	-1	ExsB
					YP_431066		Moth_2236	2331989	2334037	-1	putative ATP-dependent Lon protease
					YP_431067		Moth_2237	2334040	2336394	-1	hypothetical protein
					YP_431068		Moth_2238	2336397	2337566	-1	hypothetical protein
					YP_431069		Moth_2239	2337678	2339165	1	Integrase, catalytic region
					YP_431070		Moth_2240	2339162	2339920	1	IstB-like ATP-binding protein
					YP_431071		Moth_2241	2340019	2342214	-1	hypothetical protein
10	2447192	2463532	16340	Predicted by at least one method	YP_431156		Moth_2326	2447192	2447404	-1	hypothetical protein
					YP_431157		Moth_2327	2447404	2447661	-1	hypothetical protein
					YP_431158		Moth_2328	2447916	2449112	1	Secretion protein HlyD
					YP_431159		Moth_2329	2449112	2449819	1	ABC transporter related
					YP_431160		Moth_2330	2449812	2450951	1	ABC-2
					YP_431161		Moth_2331	2450965	2452164	1	ABC-2
					YP_431162		Moth_2332	2452244	2452852	1	transcriptional regulator, TetR family
					YP_431163		Moth_2333	2452892	2453305	-1	Protein of unknown function DUF132
					YP_431164		Moth_2334	2453302	2453754	-1	Prevent-host-death protein
					YP_431165		Moth_2335	2453823	2455379	-1	hypothetical protein
					YP_431166		Moth_2336	2455582	2456775	-1	Transposase IS66
					YP_431167		Moth_2337	2456765	2457049	-1	hypothetical protein
					YP_431168		Moth_2338	2457236	2457592	-1	IS66 Orf2 like
					YP_431169		Moth_2339	2457586	2457909	-1	hypothetical protein
					YP_431170		Moth_2341	2458296	2459960	-1	hypothetical protein
					YP_431171		Moth_2342	2460067	2461068	-1	Outer membrane protein-like
					YP_431172		Moth_2343	2461277	2463532	-1	Copper amine oxidase-like
